# Supplementary material for: miR-138-5p ameliorates intestinal barrier disruption caused by acute superior mesenteric vein thrombosis injury by inhibiting the NLRP3/HMGB1 axis
Source: PeerJ journal article supplement (doi:10.7717/peerj.16692), 2024-02-21
Supplement: DataFigure2.zip [file DataFigure2.zip]

# Plate Results Report

A22-2\_Copy.eds

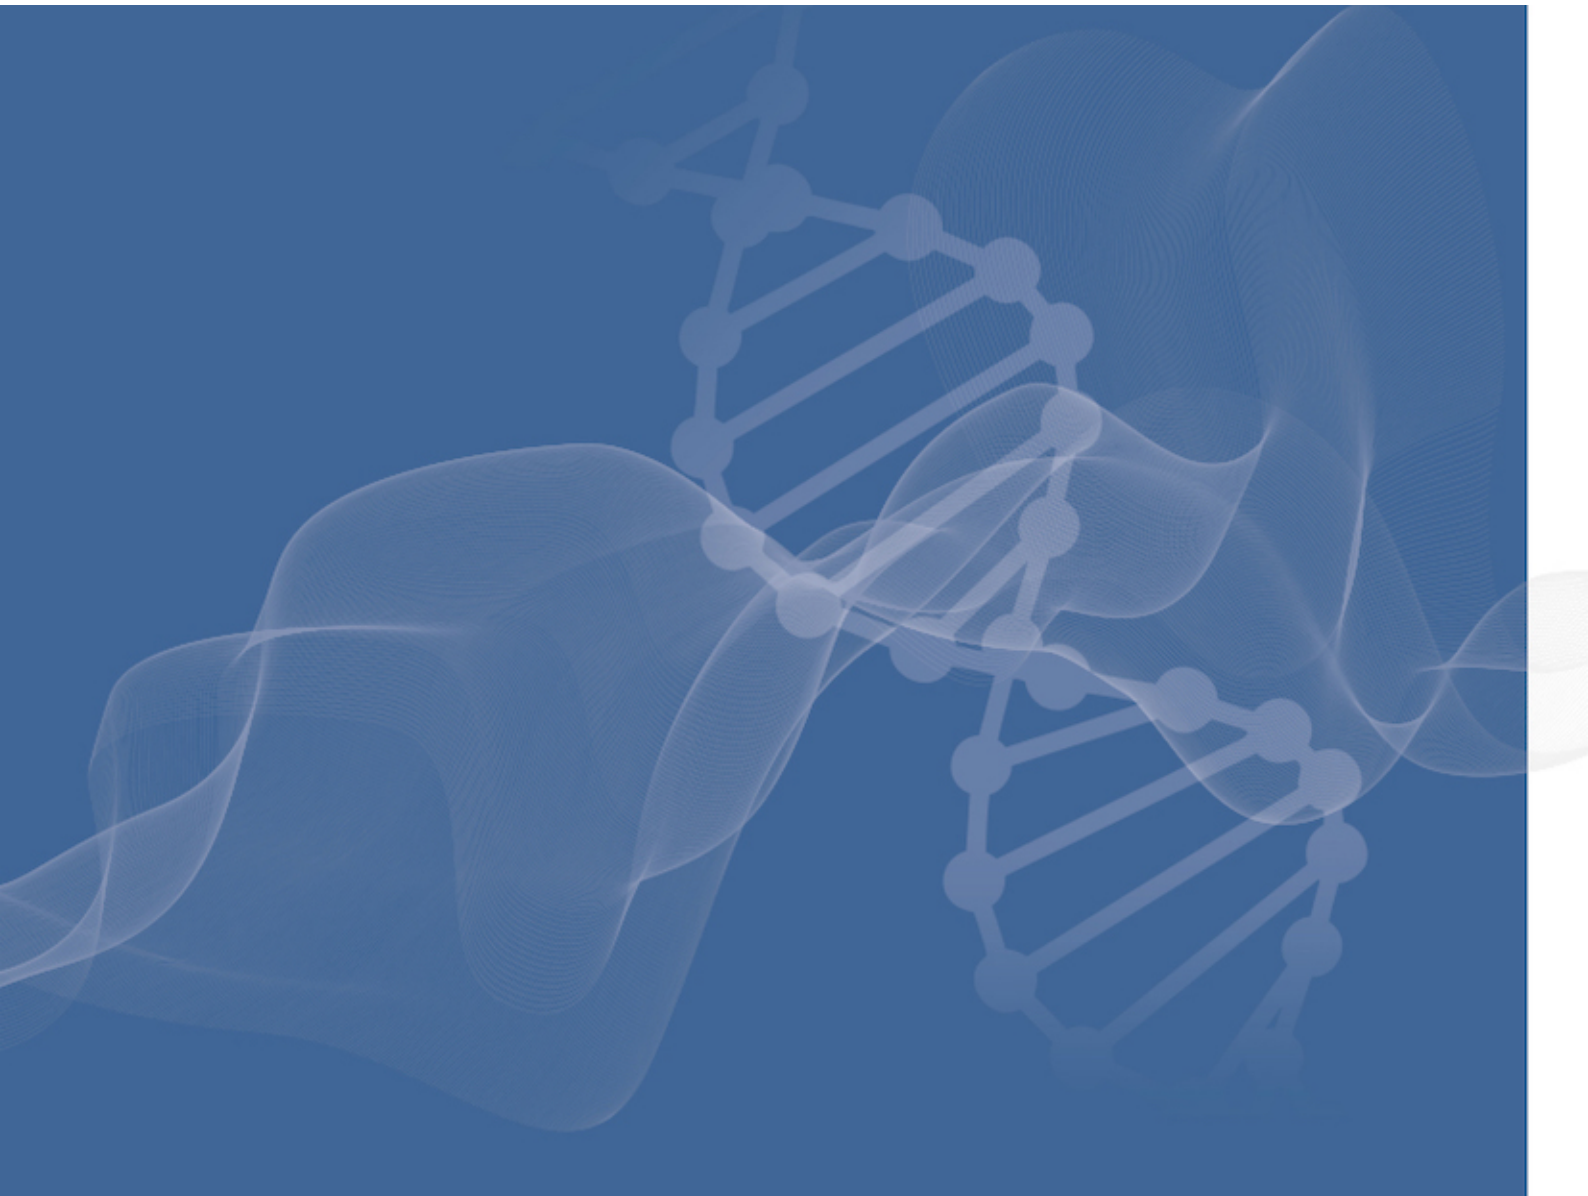

## Summary

| Property                    | Details                                                 |
|-----------------------------|---------------------------------------------------------|
| Bar Code                    | -                                                       |
| File Name                   | A22-2_Copy.eds                                          |
| Run Start Date/Time         | Dec 1, 2021 10:16:57 AM                                 |
| Run End Date/Time           | Dec 1, 2021 11:13:01 AM                                 |
| Run Duration                | 56 minutes, and 4 seconds                               |
| Operator                    | DEFAULT                                                 |
| Instrument Name             | SVT004                                                  |
| Instrument Type             | QuantStudio™ 3 System                                   |
| Instrument Serial Number    | SVT004                                                  |
| Block Type                  | 96-Well 0.2-mL                                          |
| Block Serial Number         | 41145627                                                |
| Heated Cover Serial Number  | N/A                                                     |
| PCR Stage/Step Number       | Stage 2, Step 2                                         |
| Melt Stage Number           | Stage 3                                                 |
| Quantification Cycle Method | Baseline Threshold                                      |
| Comment                     | -                                                       |
| Software Name and Version   | Design & Analysis Software v2.6.0                       |
| Plugin Name and Version     | Primary Analysis v1.7.0, Relative Quantification v1.5.0 |
| Analysis Date/Time          | Jul 17, 2023 2:48:40 PM                                 |

## Well Table

| Well | Sample      | Target     | Task    | Cq     | Cq Confidence | Amp Score | Amp Status | Cq Threshold | Baseline Start/End | Melt Temp |
|------|-------------|------------|---------|--------|---------------|-----------|------------|--------------|--------------------|-----------|
| A1   | NC          | GAPDH      | Unknown | 17.76  | 0.988         | 1.819     | AMP        | 1.316        | 3-11               | 82.507    |
| A2   | NC          | GAPDH      | Unknown | 17.815 | 0.992         | 1.832     | AMP        | 1.316        | 3-12               | 82.357    |
| A3   | NC          | GAPDH      | Unknown | 17.576 | 0.991         | 1.835     | AMP        | 1.316        | 3-10               | 82.504    |
| A4   | NC          | miR-138-5p | Unknown | 27.879 | 0.988         | 1.862     | AMP        | 1.897        | 3-20               | 82.355    |
| A5   | NC          | miR-138-5p | Unknown | 27.786 | 0.993         | 1.871     | AMP        | 1.897        | 3-19               | 82.505    |
| A6   | NC          | miR-138-5p | Unknown | 27.521 | 0.988         | 1.87      | AMP        | 1.897        | 3-18               | 82.505    |
| A7   | miR-138 mim | GAPDH      | Unknown | 17.241 | 0.991         | 1.84      | AMP        | 1.316        | 3-10               | 82.653    |
| A8   | miR-138 mim | GAPDH      | Unknown | 17.105 | 0.989         | 1.834     | AMP        | 1.316        | 3-10               | 82.653    |
| A9   | miR-138 mim | GAPDH      | Unknown | 17.38  | 0.986         | 1.84      | AMP        | 1.316        | 3-11               | 82.655    |
| A10  | miR-138 mim | miR-138-5p | Unknown | 25.157 | 0.985         | 1.846     | AMP        | 1.897        | 3-18               | 82.505    |
| A11  | miR-138 mim | miR-138-5p | Unknown | 24.957 | 0.99          | 1.849     | AMP        | 1.897        | 3-16               | 82.506    |
| A12  | miR-138 mim | miR-138-5p | Unknown | 25.257 | 0.982         | 1.822     | AMP        | 1.897        | 3-18               | 82.804    |
| B1   | NC          | GAPDH      | Unknown | 17.666 | 0.992         | 1.832     | AMP        | 1.316        | 3-11               | 82.507    |
| B2   | NC          | GAPDH      | Unknown | 17.611 | 0.993         | 1.841     | AMP        | 1.316        | 3-10               | 82.357    |
| B3   | NC          | GAPDH      | Unknown | 17.625 | 0.993         | 1.837     | AMP        | 1.316        | 3-9                | 82.504    |
| B4   | NC          | miR-138-5p | Unknown | 27.699 | 0.992         | 1.872     | AMP        | 1.897        | 3-20               | 82.355    |
| B5   | NC          | miR-138-5p | Unknown | 27.595 | 0.989         | 1.867     | AMP        | 1.897        | 3-17               | 82.356    |
| B6   | NC          | miR-138-5p | Unknown | 27.546 | 0.988         | 1.871     | AMP        | 1.897        | 3-17               | 82.356    |
| C1   | NC          | GAPDH      | Unknown | 17.704 | 0.993         | 1.84      | AMP        | 1.316        | 3-11               | 82.507    |
| C2   | NC          | GAPDH      | Unknown | 16.242 | 0.989         | 1.825     | AMP        | 1.316        | 3-10               | 82.805    |
| C3   | NC          | GAPDH      | Unknown | 17.022 | 0.986         | 1.838     | AMP        | 1.316        | 3-11               | 82.504    |
| C4   | NC          | miR-138-5p | Unknown | 27.632 | 0.989         | 1.869     | AMP        | 1.897        | 3-20               | 82.206    |
| C5   | NC          | miR-138-5p | Unknown | 27.689 | 0.99          | 1.862     | AMP        | 1.897        | 3-17               | 82.207    |
| C6   | NC          | miR-138-5p | Unknown | 27.943 | 0.988         | 1.852     | AMP        | 1.897        | 3-18               | 82.356    |
| D1   | miR-NC mim  | GAPDH      | Unknown | 16.531 | 0.986         | 1.82      | AMP        | 1.316        | 3-10               | 82.954    |
| D2   | miR-NC mim  | GAPDH      | Unknown | 17.412 | 0.991         | 1.835     | AMP        | 1.316        | 3-10               | 82.507    |
| D3   | miR-NC mim  | GAPDH      | Unknown | 17.308 | 0.991         | 1.845     | AMP        | 1.316        | 3-11               | 82.504    |
| D4   | miR-NC mim  | miR-138-5p | Unknown | 27.822 | 0.988         | 1.858     | AMP        | 1.897        | 3-19               | 82.057    |
| D5   | miR-NC mim  | miR-138-5p | Unknown | 27.747 | 0.99          | 1.867     | AMP        | 1.897        | 3-18               | 82.207    |
| D6   | miR-NC mim  | miR-138-5p | Unknown | 27.861 | 0.984         | 1.849     | AMP        | 1.897        | 3-18               | 82.207    |

| Well | Sample      | Target     | Task    | Cq     | Cq Confidence | Amp Score | Amp Status | Cq Threshold | Baseline Start/End | Melt Temp |
|------|-------------|------------|---------|--------|---------------|-----------|------------|--------------|--------------------|-----------|
| E1   | miR-NC mim  | GAPDH      | Unknown | 17.442 | 0.991         | 1.829     | AMP        | 1.316        | 3-10               | 82.805    |
| E2   | miR-NC mim  | GAPDH      | Unknown | 16.745 | 0.988         | 1.847     | AMP        | 1.316        | 3-11               | 82.805    |
| E3   | miR-NC mim  | GAPDH      | Unknown | 16.508 | 0.992         | 1.833     | AMP        | 1.316        | 3-10               | 82.654    |
| E4   | miR-NC mim  | miR-138-5p | Unknown | 27.92  | 0.991         | 1.861     | AMP        | 1.897        | 3-18               | 82.057    |
| E5   | miR-NC mim  | miR-138-5p | Unknown | 27.934 | 0.988         | 1.859     | AMP        | 1.897        | 3-19               | 82.207    |
| E6   | miR-NC mim  | miR-138-5p | Unknown | 27.921 | 0.988         | 1.854     | AMP        | 1.897        | 3-18               | 82.207    |
| F1   | miR-NC mim  | GAPDH      | Unknown | 16.779 | 0.989         | 1.83      | AMP        | 1.316        | 3-10               | 83.252    |
| F2   | miR-NC mim  | GAPDH      | Unknown | 16.604 | 0.987         | 1.842     | AMP        | 1.316        | 3-10               | 82.954    |
| F3   | miR-NC mim  | GAPDH      | Unknown | 17.324 | 0.992         | 1.848     | AMP        | 1.316        | 3-10               | 82.504    |
| F4   | miR-NC mim  | miR-138-5p | Unknown | 27.91  | 0.992         | 1.863     | AMP        | 1.897        | 3-16               | 82.057    |
| F5   | miR-NC mim  | miR-138-5p | Unknown | 28.063 | 0.986         | 1.86      | AMP        | 1.897        | 3-18               | 82.207    |
| F6   | miR-NC mim  | miR-138-5p | Unknown | 27.993 | 0.986         | 1.861     | AMP        | 1.897        | 3-18               | 82.207    |
| G1   | miR-138 mim | GAPDH      | Unknown | 16.704 | 0.99          | 1.832     | AMP        | 1.316        | 3-10               | 83.401    |
| G2   | miR-138 mim | GAPDH      | Unknown | 16.746 | 0.993         | 1.839     | AMP        | 1.316        | 3-9                | 83.103    |
| G3   | miR-138 mim | GAPDH      | Unknown | 16.587 | 0.988         | 1.843     | AMP        | 1.316        | 3-8                | 82.654    |
| G4   | miR-138 mim | miR-138-5p | Unknown | 24.801 | 0.991         | 1.865     | AMP        | 1.897        | 3-17               | 82.206    |
| G5   | miR-138 mim | miR-138-5p | Unknown | 24.998 | 0.992         | 1.859     | AMP        | 1.897        | 3-16               | 82.207    |
| G6   | miR-138 mim | miR-138-5p | Unknown | 24.896 | 0.992         | 1.866     | AMP        | 1.897        | 3-17               | 82.356    |
| H1   | miR-138 mim | GAPDH      | Unknown | 16.774 | 0.98          | 1.729     | AMP        | 1.316        | 3-10               | 83.252    |
| H2   | miR-138 mim | GAPDH      | Unknown | 16.794 | 0.989         | 1.844     | AMP        | 1.316        | 3-10               | 83.103    |
| H3   | miR-138 mim | GAPDH      | Unknown | 17.388 | 0.991         | 1.848     | AMP        | 1.316        | 3-11               | 82.504    |
| H4   | miR-138 mim | miR-138-5p | Unknown | 24.763 | 0.992         | 1.871     | AMP        | 1.897        | 3-17               | 82.355    |
| H5   | miR-138 mim | miR-138-5p | Unknown | 24.901 | 0.993         | 1.87      | AMP        | 1.897        | 3-17               | 82.356    |
| H6   | miR-138 mim | miR-138-5p | Unknown | 24.938 | 0.993         | 1.862     | AMP        | 1.897        | 3-16               | 82.505    |

## Replicate Group Table

| Sample      | Target     | No. of Replicates | Cq Mean | Cq SD |
|-------------|------------|-------------------|---------|-------|
| NC          | GAPDH      | 9                 | 17.447  | 0.507 |
| NC          | miR-138-5p | 9                 | 27.699  | 0.146 |
| miR-138 mim | GAPDH      | 9                 | 16.969  | 0.31  |
| miR-138 mim | miR-138-5p | 9                 | 24.963  | 0.159 |
| miR-NC mim  | GAPDH      | 9                 | 16.962  | 0.401 |
| miR-NC mim  | miR-138-5p | 9                 | 27.908  | 0.092 |

## Plate Layout

|   | 1                               | 2                               | 3                               | 4                                    | 5                                    | 6                                    | 7                               | 8                               | 9                              | 10                                   | 11                                   | 12                                   |
|---|---------------------------------|---------------------------------|---------------------------------|--------------------------------------|--------------------------------------|--------------------------------------|---------------------------------|---------------------------------|--------------------------------|--------------------------------------|--------------------------------------|--------------------------------------|
| A | ● NC<br>GAPDH (17.76)           | ● NC<br>GAPDH (17.815)          | ● NC<br>GAPDH (17.576)          | ● NC<br>miR-138-5p (27.879)          | ● NC<br>miR-138-5p (27.786)          | ● NC<br>miR-138-5p (27.521)          | ● miR-138 mim<br>GAPDH (17.241) | ● miR-138 mim<br>GAPDH (17.105) | ● miR-138 mim<br>GAPDH (17.38) | ● miR-138 mim<br>miR-138-5p (25.157) | ● miR-138 mim<br>miR-138-5p (24.957) | ● miR-138 mim<br>miR-138-5p (25.257) |
| B | ● NC<br>GAPDH (17.666)          | ● NC<br>GAPDH (17.611)          | ● NC<br>GAPDH (17.625)          | ● NC<br>miR-138-5p (27.699)          | ● NC<br>miR-138-5p (27.595)          | ● NC<br>miR-138-5p (27.546)          |                                 |                                 |                                |                                      |                                      |                                      |
| C | ● NC<br>GAPDH (17.704)          | ● NC<br>GAPDH (16.242)          | ● NC<br>GAPDH (17.022)          | ● NC<br>miR-138-5p (27.632)          | ● NC<br>miR-138-5p (27.689)          | ● NC<br>miR-138-5p (27.943)          |                                 |                                 |                                |                                      |                                      |                                      |
| D | ● miR-NC mim<br>GAPDH (16.531)  | ● miR-NC mim<br>GAPDH (17.412)  | ● miR-NC mim<br>GAPDH (17.308)  | ● miR-NC mim<br>miR-138-5p (27.822)  | ● miR-NC mim<br>miR-138-5p (27.747)  | ● miR-NC mim<br>miR-138-5p (27.861)  |                                 |                                 |                                |                                      |                                      |                                      |
| E | ● miR-NC mim<br>GAPDH (17.442)  | ● miR-NC mim<br>GAPDH (16.745)  | ● miR-NC mim<br>GAPDH (16.508)  | ● miR-NC mim<br>miR-138-5p (27.92)   | ● miR-NC mim<br>miR-138-5p (27.934)  | ● miR-NC mim<br>miR-138-5p (27.921)  |                                 |                                 |                                |                                      |                                      |                                      |
| F | ● miR-NC mim<br>GAPDH (16.779)  | ● miR-NC mim<br>GAPDH (16.604)  | ● miR-NC mim<br>GAPDH (17.324)  | ● miR-NC mim<br>miR-138-5p (27.91)   | ● miR-NC mim<br>miR-138-5p (28.063)  | ● miR-NC mim<br>miR-138-5p (27.993)  |                                 |                                 |                                |                                      |                                      |                                      |
| G | ● miR-138 mim<br>GAPDH (16.704) | ● miR-138 mim<br>GAPDH (16.746) | ● miR-138 mim<br>GAPDH (16.587) | ● miR-138 mim<br>miR-138-5p (24.801) | ● miR-138 mim<br>miR-138-5p (24.998) | ● miR-138 mim<br>miR-138-5p (24.896) |                                 |                                 |                                |                                      |                                      |                                      |
| H | ● miR-138 mim<br>GAPDH (16.774) | ● miR-138 mim<br>GAPDH (16.794) | ● miR-138 mim<br>GAPDH (17.388) | ● miR-138 mim<br>miR-138-5p (24.763) | ● miR-138 mim<br>miR-138-5p (24.901) | ● miR-138 mim<br>miR-138-5p (24.938) |                                 |                                 |                                |                                      |                                      |                                      |

## Amplification Plot (dRn)

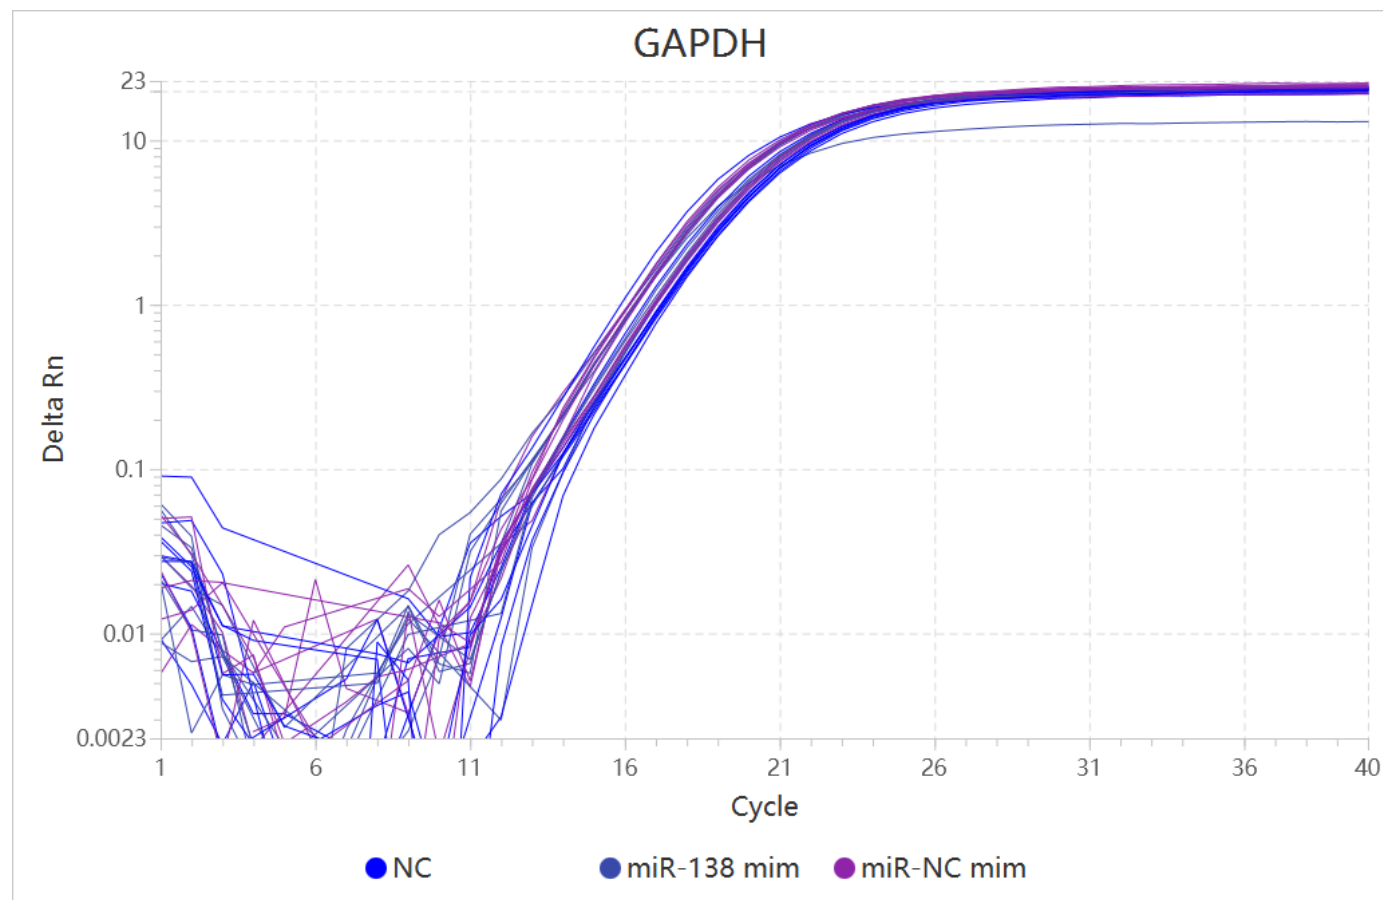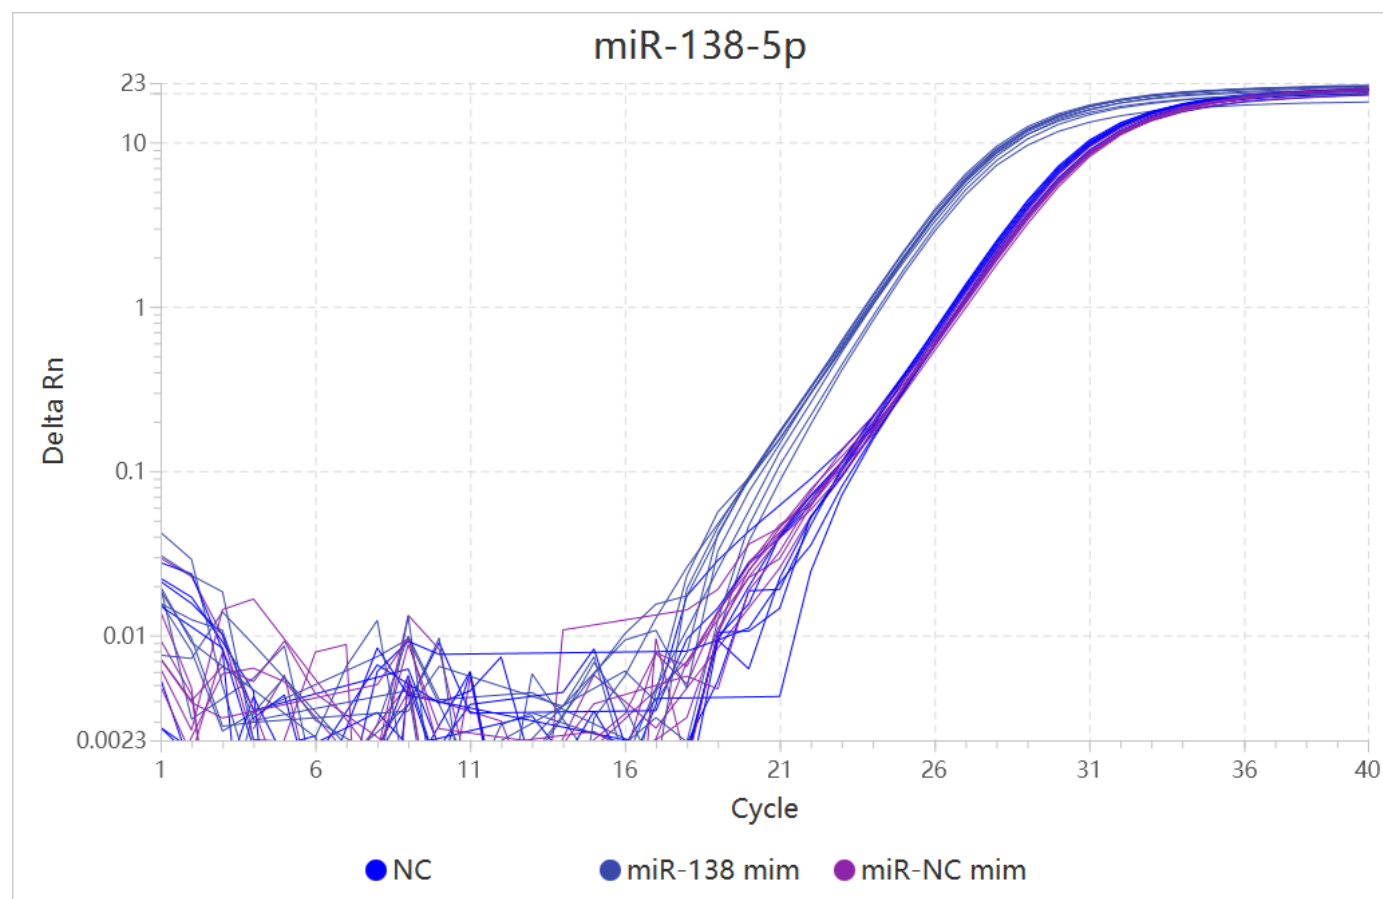

## Amplification Plot (Rn)

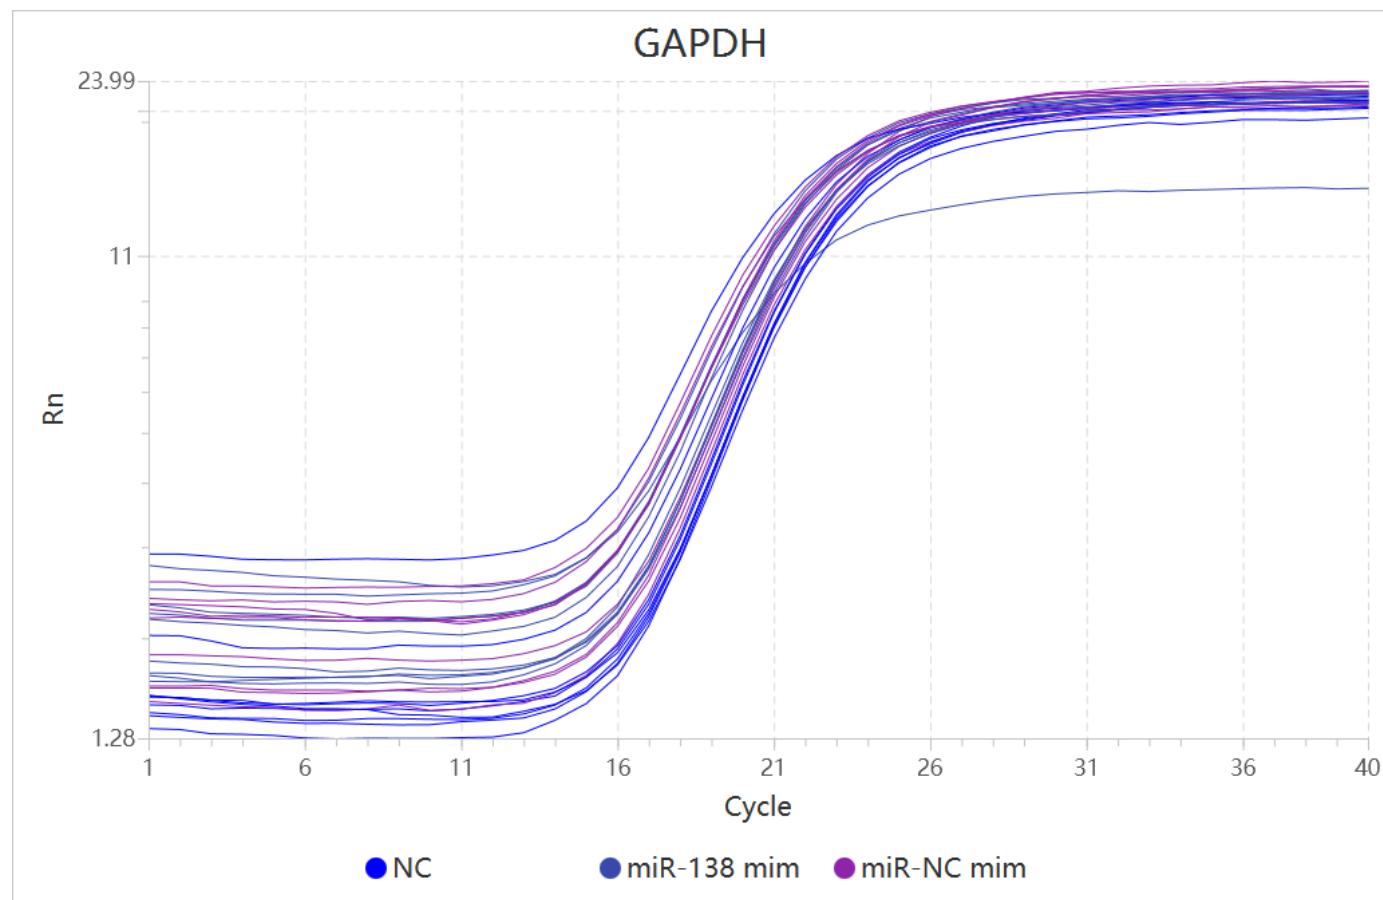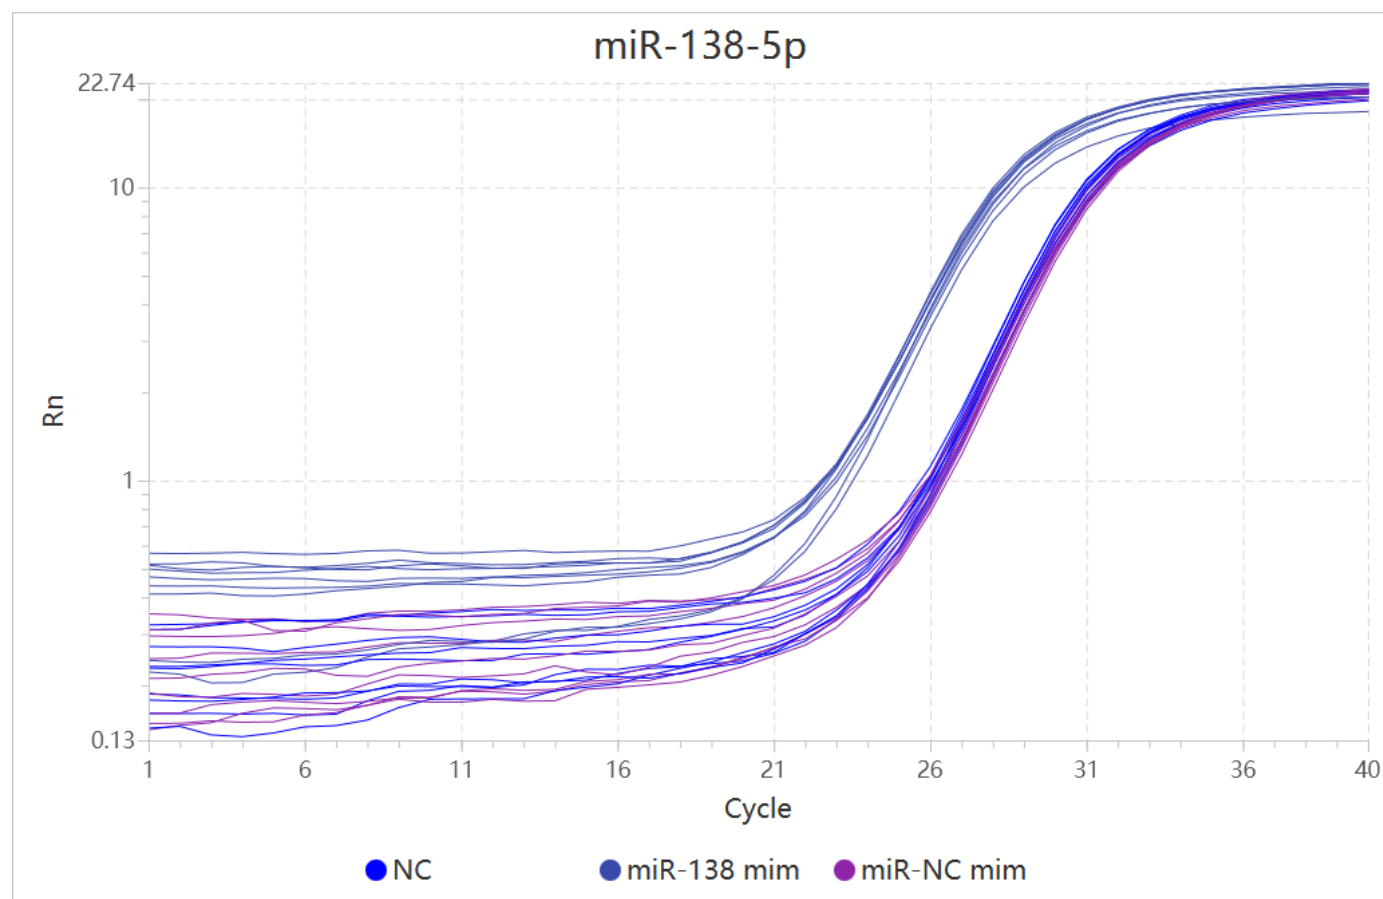



Melt Curve Plot

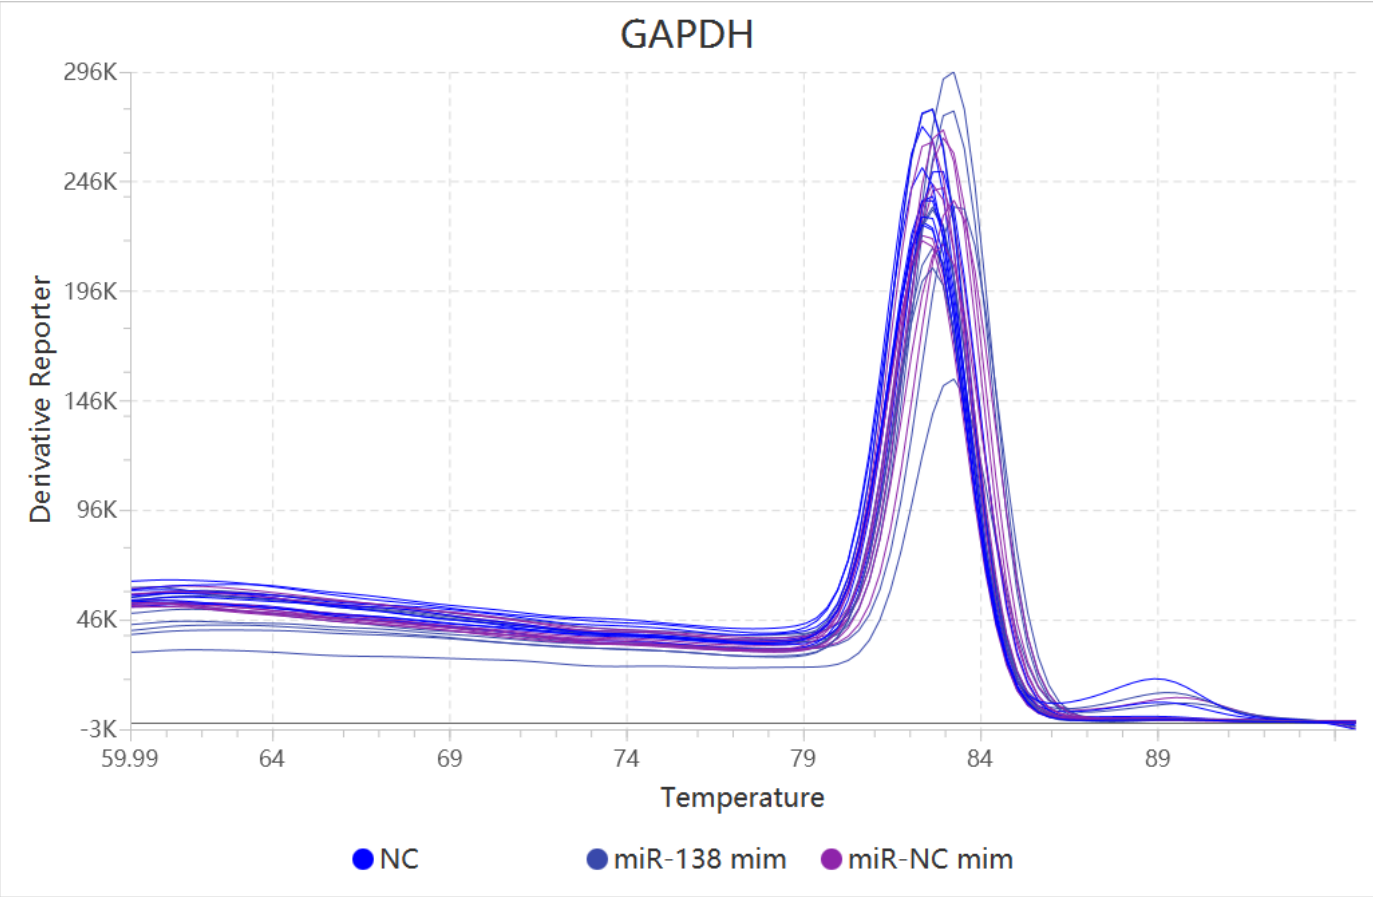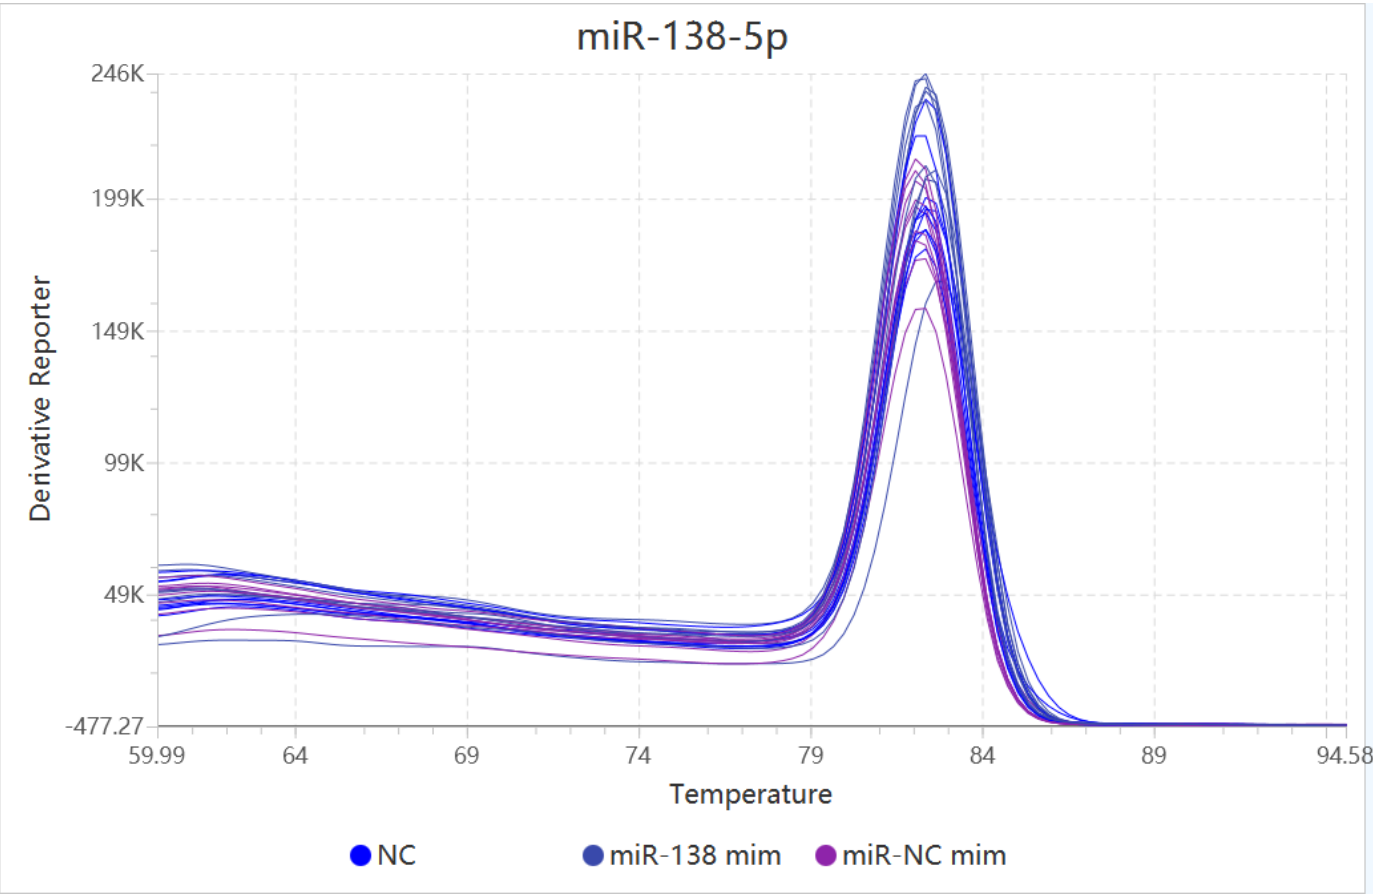

## Run Method

Block Type 96-Well 0.2-mL Block  
Sample Volume 20.0  
Cover Temperature 105.0  
Run mode FAST

| Stage                 | Collection Flag | Ramp Rate  | Temperature | Hold Time | Starting Cycle | Auto Delta Temperature | Auto Delta Hold Time |
|-----------------------|-----------------|------------|-------------|-----------|----------------|------------------------|----------------------|
| Hold Stage            | false           | 2.74°C/sec | 95.0°C      | 20        | -              | -                      | -                    |
| PCR Stage (40 cycles) | false           | 2.74°C/sec | 95.0°C      | 1         | -              | -                      | -                    |
|                       | true            | 2.12°C/sec | 60.0°C      | 20        | -              | -                      | -                    |
| Melt Stage            | false           | 2.74°C/sec | 95.0°C      | 1         | -              | -                      | -                    |
|                       | false           | 2.12°C/sec | 60.0°C      | 20        | -              | -                      | -                    |
|                       | true            | 0.15°C/sec | 95.0°C      | 1         | -              | -                      | -                    |

## Primary Analysis Settings

### General

PCR Stage/Step Stage 2, Step 2  
Quantification Cycle Method Baseline Threshold

| Target  | Auto Threshold | Threshold | Auto Baseline | Baseline Start | Baseline End |
|---------|----------------|-----------|---------------|----------------|--------------|
| DEFAULT | Yes            | AUTO      | Yes           | AUTO           | AUTO         |

### Melt

Melt Stage/Step Stage 3, Step 3

| Target  | Multi Peak | Threshold Type | Peak Level (%) | Peak Height |
|---------|------------|----------------|----------------|-------------|
| DEFAULT | Yes        | Percentage     | 10             | -           |
| GAPDH   | Yes        | Percentage     | 10             | -           |

### QC Alerts

Curve Quality Alert Enabled No  
Results Quality Alert Enabled Yes

### Advanced

Set the Delta-Rn below which curves will be considered Non-Amplified No  
Primary Analysis Variant N/A

## Relative Quantification Settings

### General

|                            |                         |
|----------------------------|-------------------------|
| RQ Min/Max Calculations    | Confidence Level (95.0) |
| Max Allowed EqCq Mean      | 40                      |
| Include Adjusted EqCq Mean | No                      |
| Analysis Type              | Singleplex              |

### Endo Controls

|                    |                             |
|--------------------|-----------------------------|
| Normalization Type | Specific endogenous control |
|--------------------|-----------------------------|

| Target | Endogenous Control | Auto | Efficiency(%) |
|--------|--------------------|------|---------------|
| GAPDH  | Yes                | Yes  | AUTO          |

### References

|                  |    |
|------------------|----|
| Reference Sample | NC |
|------------------|----|

## Relative Quantification Results (Sample)

| Sample      | Target     | EqCq Mean | Adjusted EqCq Mean | $\Delta$ EqCq Mean | $\Delta$ EqCq SD | $\Delta$ EqCq SE | $\Delta\Delta$ EqCq | RQ    | RQ Min | RQ Max |
|-------------|------------|-----------|--------------------|--------------------|------------------|------------------|---------------------|-------|--------|--------|
| NC          | GAPDH      | 17.447    | 17.447             | -                  | -                | -                | -                   | -     | -      | -      |
| NC          | miR-138-5p | 27.699    | 27.699             | 10.252             | 0.527            | 0.176            | -                   | 1     | 0.772  | 1.295  |
| miR-138 mim | GAPDH      | 16.969    | 16.969             | -                  | -                | -                | -                   | -     | -      | -      |
| miR-138 mim | miR-138-5p | 24.963    | 24.963             | 7.994              | 0.349            | 0.116            | -2.258              | 4.782 | 4.032  | 5.673  |
| miR-NC mim  | GAPDH      | 16.962    | 16.962             | -                  | -                | -                | -                   | -     | -      | -      |
| miR-NC mim  | miR-138-5p | 27.908    | 27.908             | 10.946             | 0.411            | 0.137            | 0.694               | 0.618 | 0.505  | 0.756  |

## Relative Quantification Plot

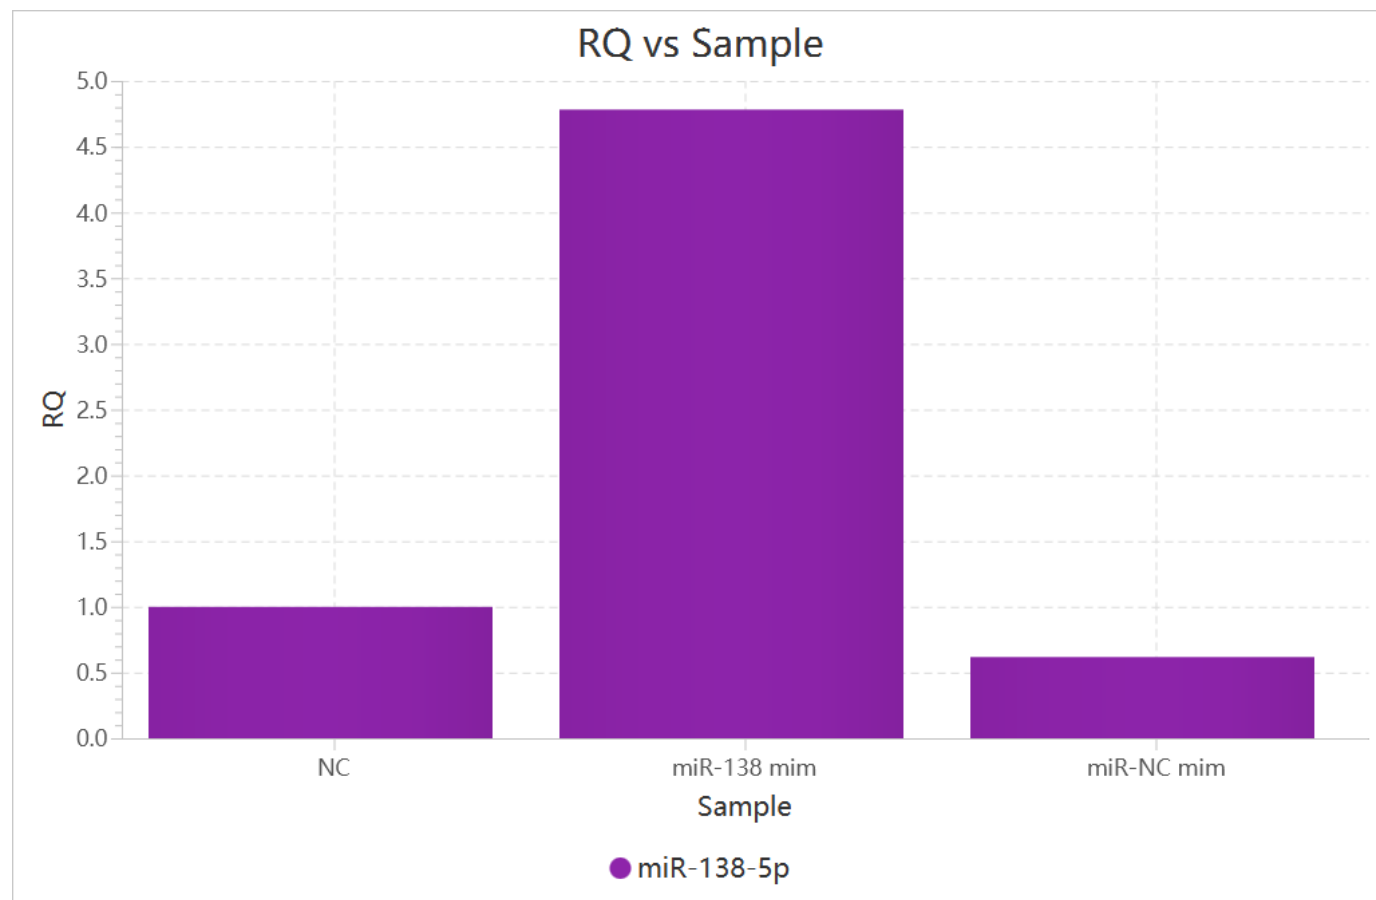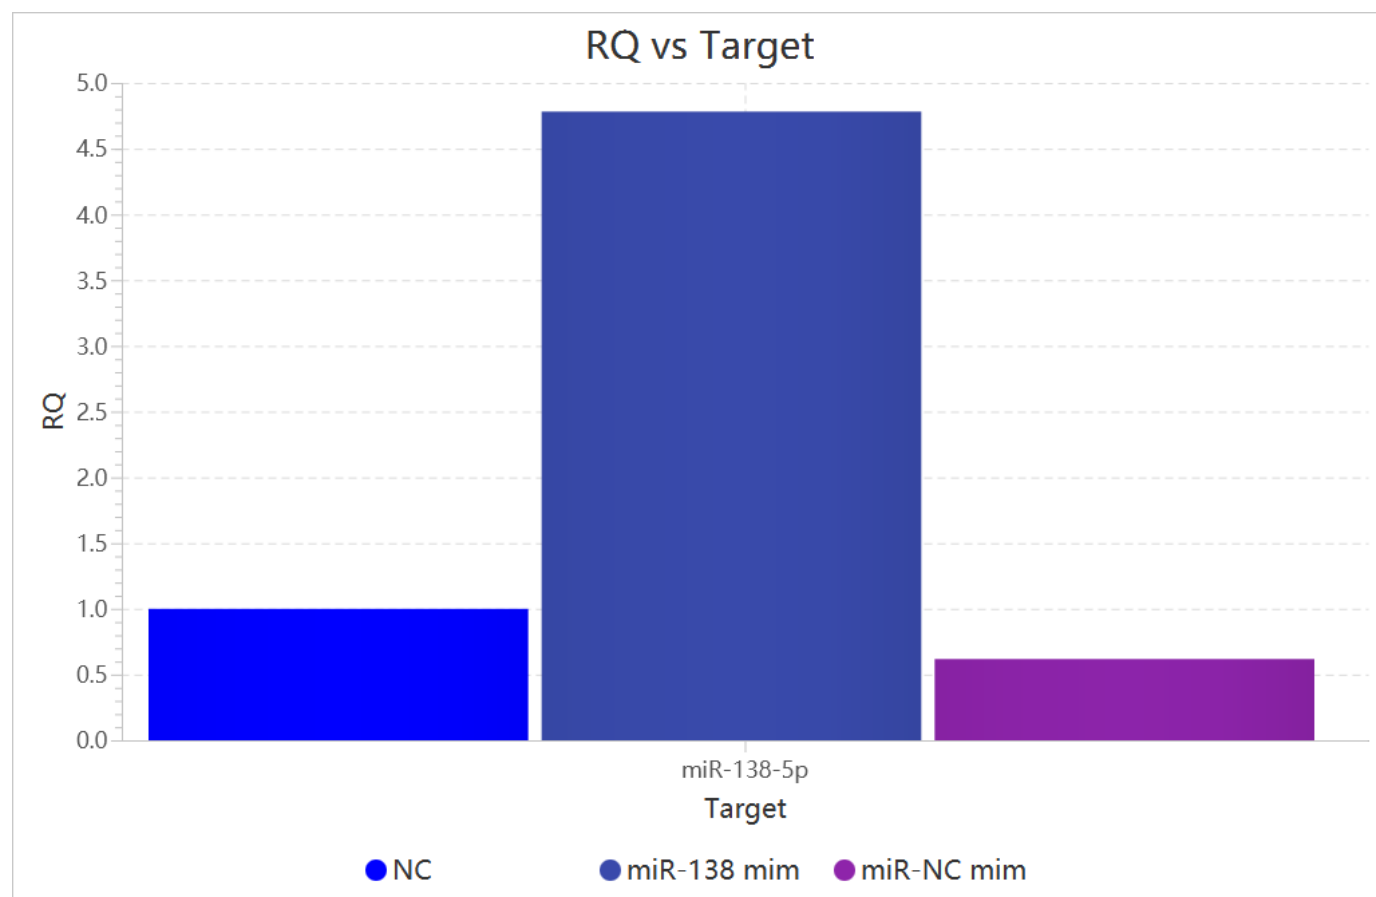

- End of Report -
