# Supplementary material for: miR-138-5p ameliorates intestinal barrier disruption caused by acute superior mesenteric vein thrombosis injury by inhibiting the NLRP3/HMGB1 axis
Source: PeerJ journal article supplement (doi:10.7717/peerj.16692), 2024-02-21
Supplement: DataFigure2.zip [file DataFigure2.zip]

# Plate Results Report

A22-1\_Copy.eds

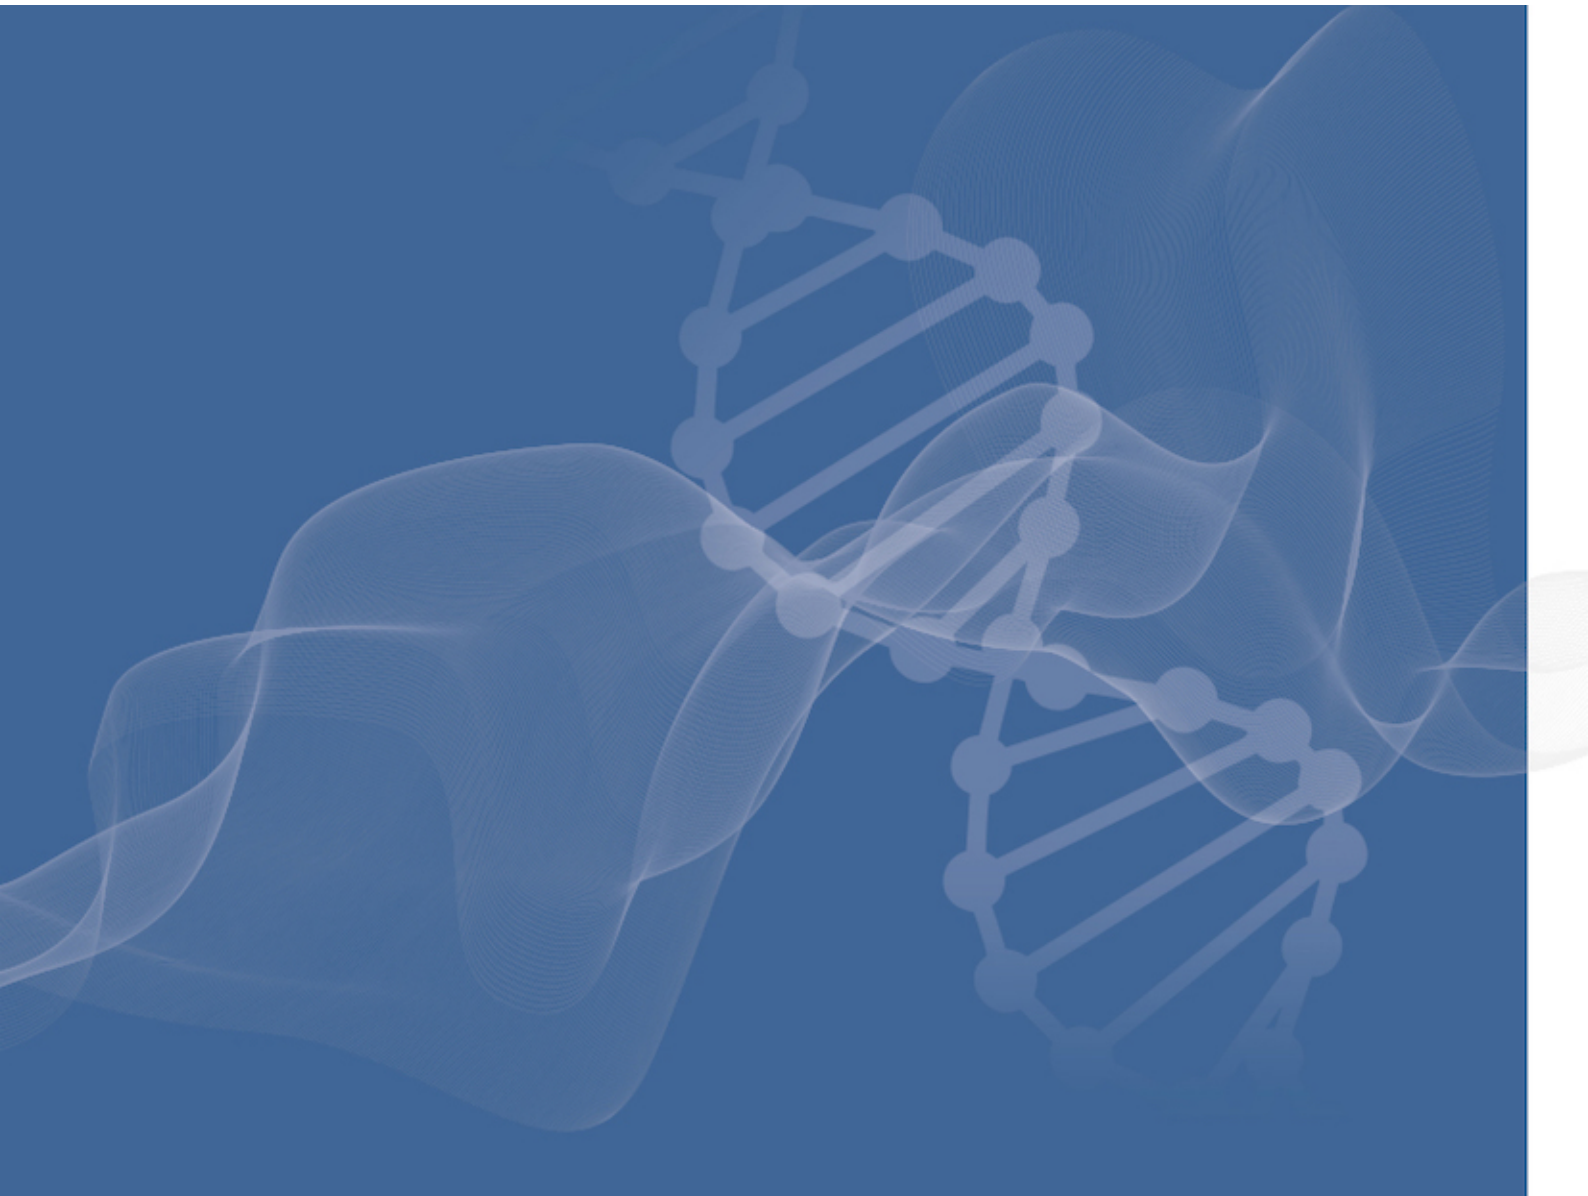

## Summary

| Property                    | Details                                                 |
|-----------------------------|---------------------------------------------------------|
| Bar Code                    | -                                                       |
| File Name                   | A22-1_Copy.eds                                          |
| Run Start Date/Time         | Dec 1, 2021 10:16:57 AM                                 |
| Run End Date/Time           | Dec 1, 2021 11:13:01 AM                                 |
| Run Duration                | 56 minutes, and 4 seconds                               |
| Operator                    | DEFAULT                                                 |
| Instrument Name             | SVT004                                                  |
| Instrument Type             | QuantStudio™ 3 System                                   |
| Instrument Serial Number    | SVT004                                                  |
| Block Type                  | 96-Well 0.2-mL                                          |
| Block Serial Number         | 41145627                                                |
| Heated Cover Serial Number  | N/A                                                     |
| PCR Stage/Step Number       | Stage 2, Step 2                                         |
| Melt Stage Number           | Stage 3                                                 |
| Quantification Cycle Method | Baseline Threshold                                      |
| Comment                     | -                                                       |
| Software Name and Version   | Design & Analysis Software v2.6.0                       |
| Plugin Name and Version     | Primary Analysis v1.7.0, Relative Quantification v1.5.0 |
| Analysis Date/Time          | Jul 17, 2023 2:44:28 PM                                 |

## Well Table

| Well | Sample | Target     | Task    | Cq     | Cq Confidence | Amp Score | Amp Status | Cq Thresh hold | Baseline Start/End | Melt Temp |
|------|--------|------------|---------|--------|---------------|-----------|------------|----------------|--------------------|-----------|
| C7   | Sham   | GAPDH      | Unknown | 17.76  | 0.989         | 1.834     | AMP        | 1.865          | 3-11               | 82.653    |
| C8   | Sham   | GAPDH      | Unknown | 17.28  | 0.96          | 1.827     | AMP        | 1.865          | 3-11               | 82.653    |
| C9   | Sham   | GAPDH      | Unknown | 17.347 | 0.985         | 1.838     | AMP        | 1.865          | 3-10               | 82.655    |
| C10  | Sham   | miR-138-5p | Unknown | 24.989 | 0.991         | 1.861     | AMP        | 2.05           | 3-16               | 82.356    |
| C11  | Sham   | miR-138-5p | Unknown | 24.956 | 0.99          | 1.85      | AMP        | 2.05           | 3-16               | 82.208    |
| C12  | Sham   | miR-138-5p | Unknown | 24.981 | 0.99          | 1.85      | AMP        | 2.05           | 3-16               | 82.208    |
| D7   | Sham   | GAPDH      | Unknown | 17.651 | 0.985         | 1.844     | AMP        | 1.865          | 3-10               | 82.653    |
| D8   | Sham   | GAPDH      | Unknown | 17.254 | 0.986         | 1.844     | AMP        | 1.865          | 3-10               | 82.653    |
| D9   | Sham   | GAPDH      | Unknown | 17.372 | 0.99          | 1.845     | AMP        | 1.865          | 3-10               | 82.655    |
| D10  | Sham   | miR-138-5p | Unknown | 24.937 | 0.987         | 1.862     | AMP        | 2.05           | 3-16               | 82.356    |
| D11  | Sham   | miR-138-5p | Unknown | 24.938 | 0.99          | 1.855     | AMP        | 2.05           | 3-16               | 82.059    |
| D12  | Sham   | miR-138-5p | Unknown | 24.961 | 0.987         | 1.861     | AMP        | 2.05           | 3-16               | 82.059    |
| E7   | Sham   | GAPDH      | Unknown | 18.008 | 0.945         | 1.838     | AMP        | 1.865          | 3-12               | 82.504    |
| E8   | Sham   | GAPDH      | Unknown | 18.045 | 0.987         | 1.851     | AMP        | 1.865          | 3-11               | 82.504    |
| E9   | Sham   | GAPDH      | Unknown | 17.389 | 0.988         | 1.837     | AMP        | 1.865          | 3-10               | 82.655    |
| E10  | Sham   | miR-138-5p | Unknown | 24.989 | 0.991         | 1.853     | AMP        | 2.05           | 3-16               | 82.356    |
| E11  | Sham   | miR-138-5p | Unknown | 24.984 | 0.992         | 1.841     | AMP        | 2.05           | 3-16               | 81.91     |
| E12  | Sham   | miR-138-5p | Unknown | 24.885 | 0.985         | 1.861     | AMP        | 2.05           | 3-16               | 82.059    |
| F7   | ASMVT  | GAPDH      | Unknown | 17.922 | 0.993         | 1.834     | AMP        | 1.865          | 3-10               | 82.504    |
| F8   | ASMVT  | GAPDH      | Unknown | 17.506 | 0.989         | 1.841     | AMP        | 1.865          | 3-10               | 82.653    |
| F9   | ASMVT  | GAPDH      | Unknown | 17.53  | 0.989         | 1.839     | AMP        | 1.865          | 3-10               | 82.655    |
| F10  | ASMVT  | miR-138-5p | Unknown | 28.066 | 0.984         | 1.868     | AMP        | 2.05           | 3-19               | 82.058    |
| F11  | ASMVT  | miR-138-5p | Unknown | 28.09  | 0.983         | 1.85      | AMP        | 2.05           | 3-20               | 81.612    |
| F12  | ASMVT  | miR-138-5p | Unknown | 28.029 | 0.983         | 1.852     | AMP        | 2.05           | 3-20               | 81.761    |
| G7   | ASMVT  | GAPDH      | Unknown | 17.363 | 0.99          | 1.847     | AMP        | 1.865          | 3-10               | 82.653    |
| G8   | ASMVT  | GAPDH      | Unknown | 17.918 | 0.988         | 1.847     | AMP        | 1.865          | 3-11               | 82.504    |
| G9   | ASMVT  | GAPDH      | Unknown | 17.876 | 0.99          | 1.845     | AMP        | 1.865          | 3-10               | 82.505    |
| G10  | ASMVT  | miR-138-5p | Unknown | 28.076 | 0.985         | 1.86      | AMP        | 2.05           | 3-18               | 82.207    |
| G11  | ASMVT  | miR-138-5p | Unknown | 27.984 | 0.989         | 1.839     | AMP        | 2.05           | 3-19               | 81.761    |
| G12  | ASMVT  | miR-138-5p | Unknown | 28.085 | 0.969         | 1.857     | AMP        | 2.05           | 3-20               | 81.761    |

| Well | Sample | Target     | Task    | Cq     | Cq Confidence | Amp Score | Amp Status | Cq Threshold | Baseline Start/End | Melt Temp |
|------|--------|------------|---------|--------|---------------|-----------|------------|--------------|--------------------|-----------|
| H7   | ASMVT  | GAPDH      | Unknown | 17.725 | 0.986         | 1.849     | AMP        | 1.865        | 3-10               | 82.653    |
| H8   | ASMVT  | GAPDH      | Unknown | 17.528 | 0.992         | 1.842     | AMP        | 1.865        | 3-10               | 82.504    |
| H9   | ASMVT  | GAPDH      | Unknown | 17.43  | 0.989         | 1.836     | AMP        | 1.865        | 3-9                | 82.655    |
| H10  | ASMVT  | miR-138-5p | Unknown | 27.978 | 0.992         | 1.859     | AMP        | 2.05         | 3-20               | 82.356    |
| H11  | ASMVT  | miR-138-5p | Unknown | 27.979 | 0.991         | 1.858     | AMP        | 2.05         | 3-19               | 81.761    |
| H12  | ASMVT  | miR-138-5p | Unknown | 28.139 | 0.984         | 1.836     | AMP        | 2.05         | 3-20               | 81.761    |

## Replicate Group Table

| Sample | Target     | No. of Replicates | Cq Mean | Cq SD |
|--------|------------|-------------------|---------|-------|
| ASMVT  | GAPDH      | 9                 | 17.644  | 0.219 |
| ASMVT  | miR-138-5p | 9                 | 28.047  | 0.058 |
| Sham   | GAPDH      | 9                 | 17.567  | 0.309 |
| Sham   | miR-138-5p | 9                 | 24.958  | 0.034 |

## Plate Layout

|   | 1 | 2 | 3 | 4 | 5 | 6 | 7                        | 8                        | 9                        | 10                            | 11                            | 12                            |
|---|---|---|---|---|---|---|--------------------------|--------------------------|--------------------------|-------------------------------|-------------------------------|-------------------------------|
| A |   |   |   |   |   |   |                          |                          |                          |                               |                               |                               |
| B |   |   |   |   |   |   |                          |                          |                          |                               |                               |                               |
| C |   |   |   |   |   |   | ● Sham<br>GAPDH (17.76)  | ● Sham<br>GAPDH (17.28)  | ● Sham<br>GAPDH (17.347) | ● Sham<br>miR-138-5p (24.989) | ● Sham<br>miR-138-5p (24.956) | ● Sham<br>miR-138-5p (24.981) |
| D |   |   |   |   |   |   | ● Sham<br>GAPDH (17.651) | ● Sham<br>GAPDH (17.254) | ● Sham<br>GAPDH (17.372) | ● Sham<br>miR-138-5p (24.937) | ● Sham<br>miR-138-5p (24.938) | ● Sham<br>miR-138-5p (24.961) |
| E |   |   |   |   |   |   | ● Sham<br>GAPDH (18.008) | ● Sham<br>GAPDH (18.045) | ● Sham<br>GAPDH (17.389) | ● Sham<br>miR-138-5p (24.989) | ● Sham<br>miR-138-5p (24.984) | ● Sham<br>miR-138-5p (24.885) |
| F |   |   |   |   |   |   | ● ASMT<br>GAPDH (17.922) | ● ASMT<br>GAPDH (17.506) | ● ASMT<br>GAPDH (17.53)  | ● ASMT<br>miR-138-5p (28.066) | ● ASMT<br>miR-138-5p (28.09)  | ● ASMT<br>miR-138-5p (28.029) |
| G |   |   |   |   |   |   | ● ASMT<br>GAPDH (17.363) | ● ASMT<br>GAPDH (17.918) | ● ASMT<br>GAPDH (17.876) | ● ASMT<br>miR-138-5p (28.076) | ● ASMT<br>miR-138-5p (27.984) | ● ASMT<br>miR-138-5p (28.085) |
| H |   |   |   |   |   |   | ● ASMT<br>GAPDH (17.725) | ● ASMT<br>GAPDH (17.528) | ● ASMT<br>GAPDH (17.43)  | ● ASMT<br>miR-138-5p (27.978) | ● ASMT<br>miR-138-5p (27.979) | ● ASMT<br>miR-138-5p (28.139) |

## Amplification Plot (dRn)

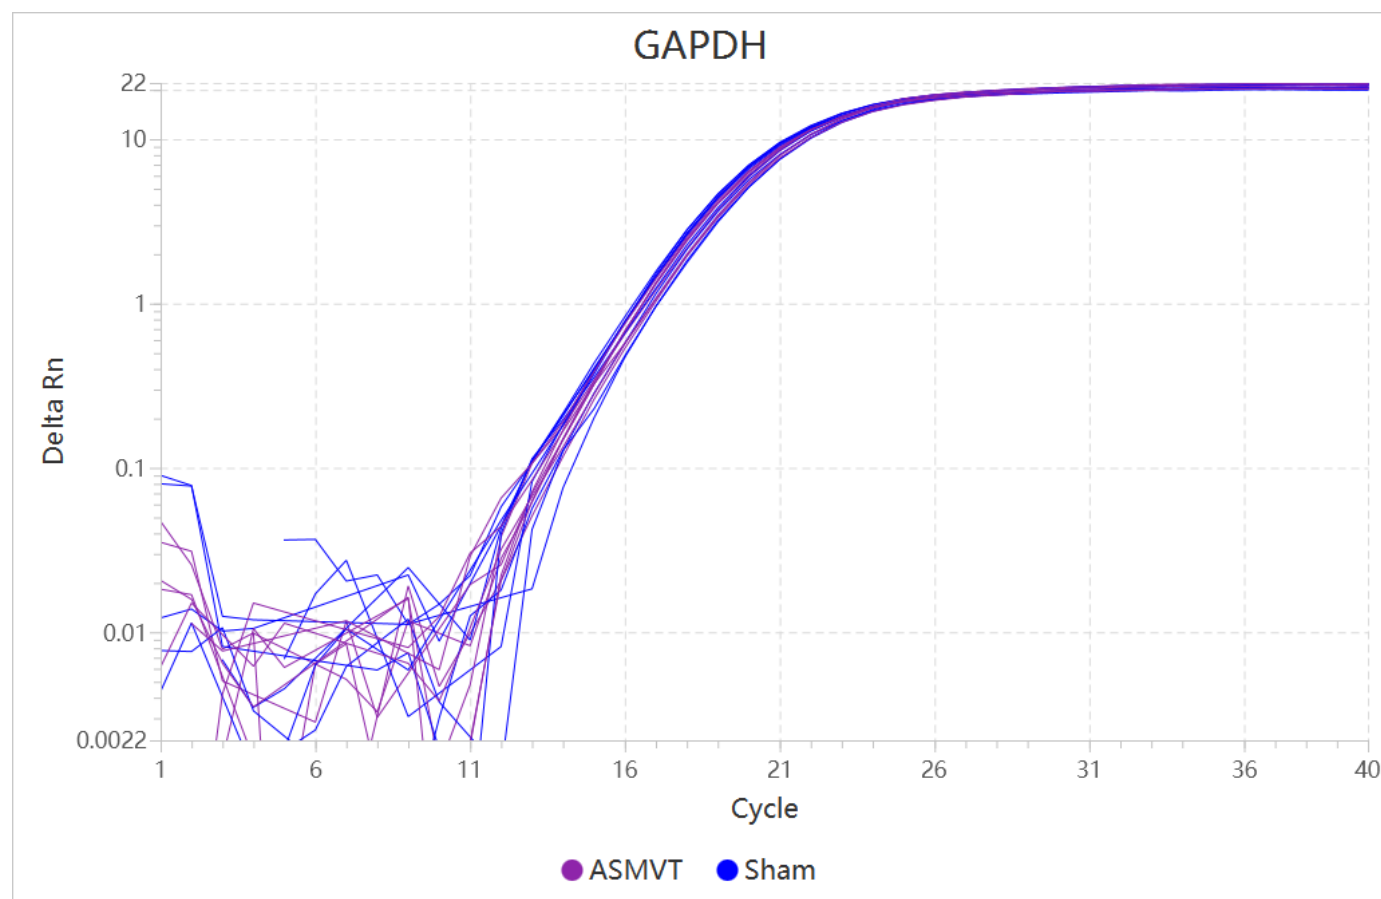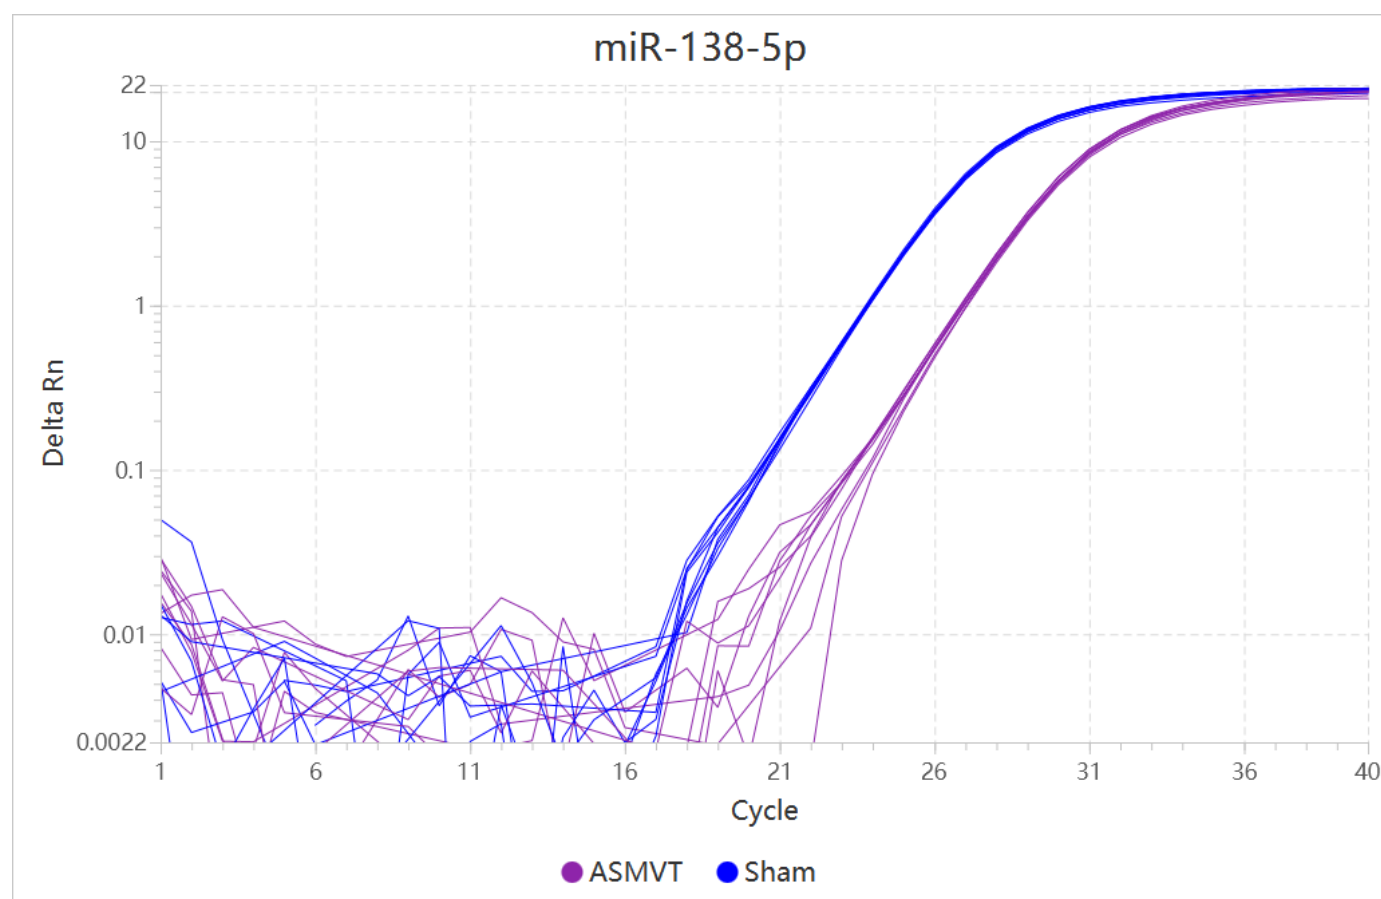

## Amplification Plot (Rn)

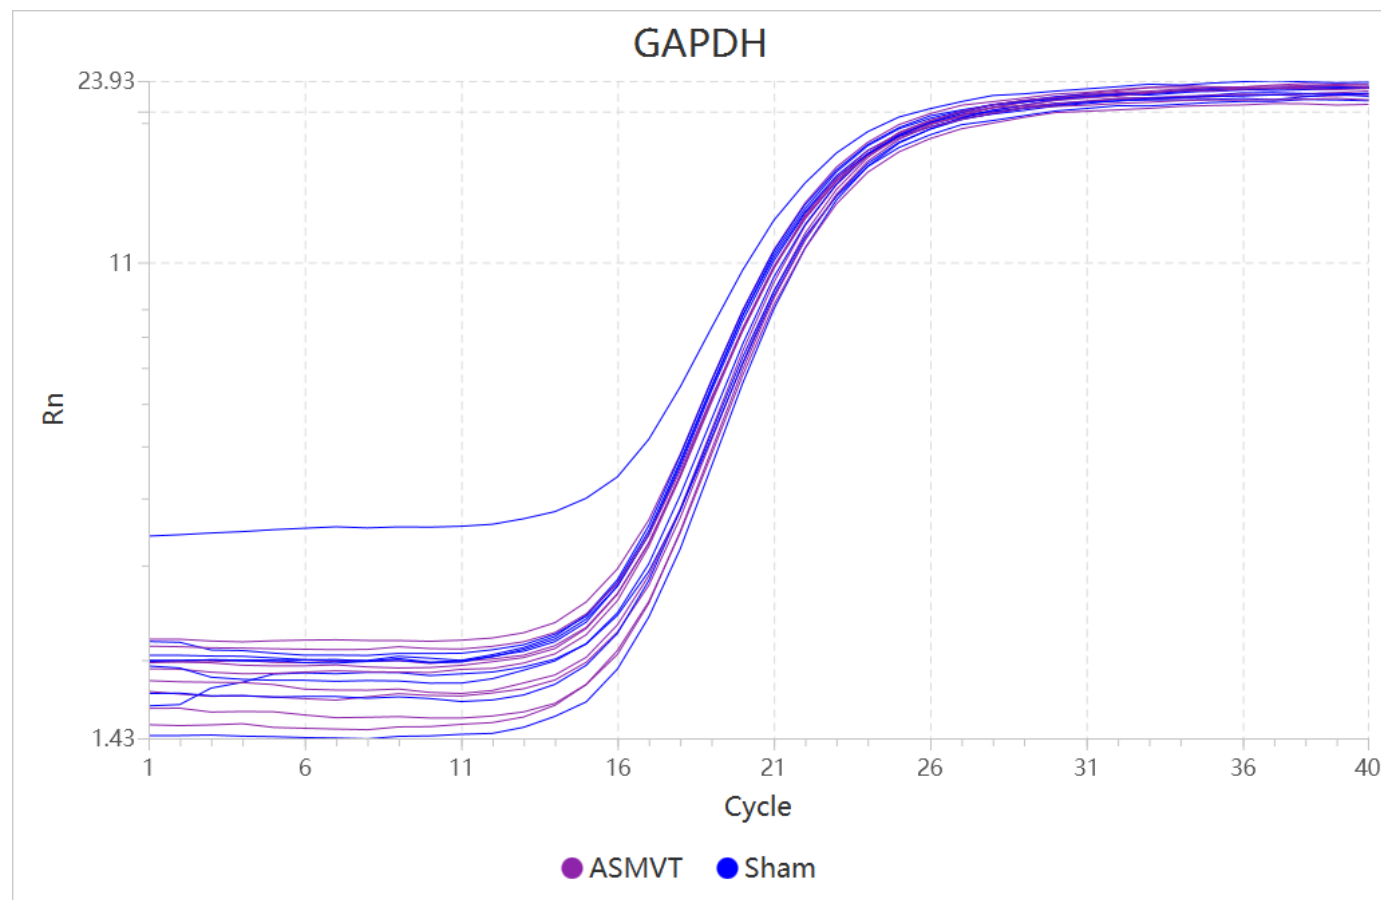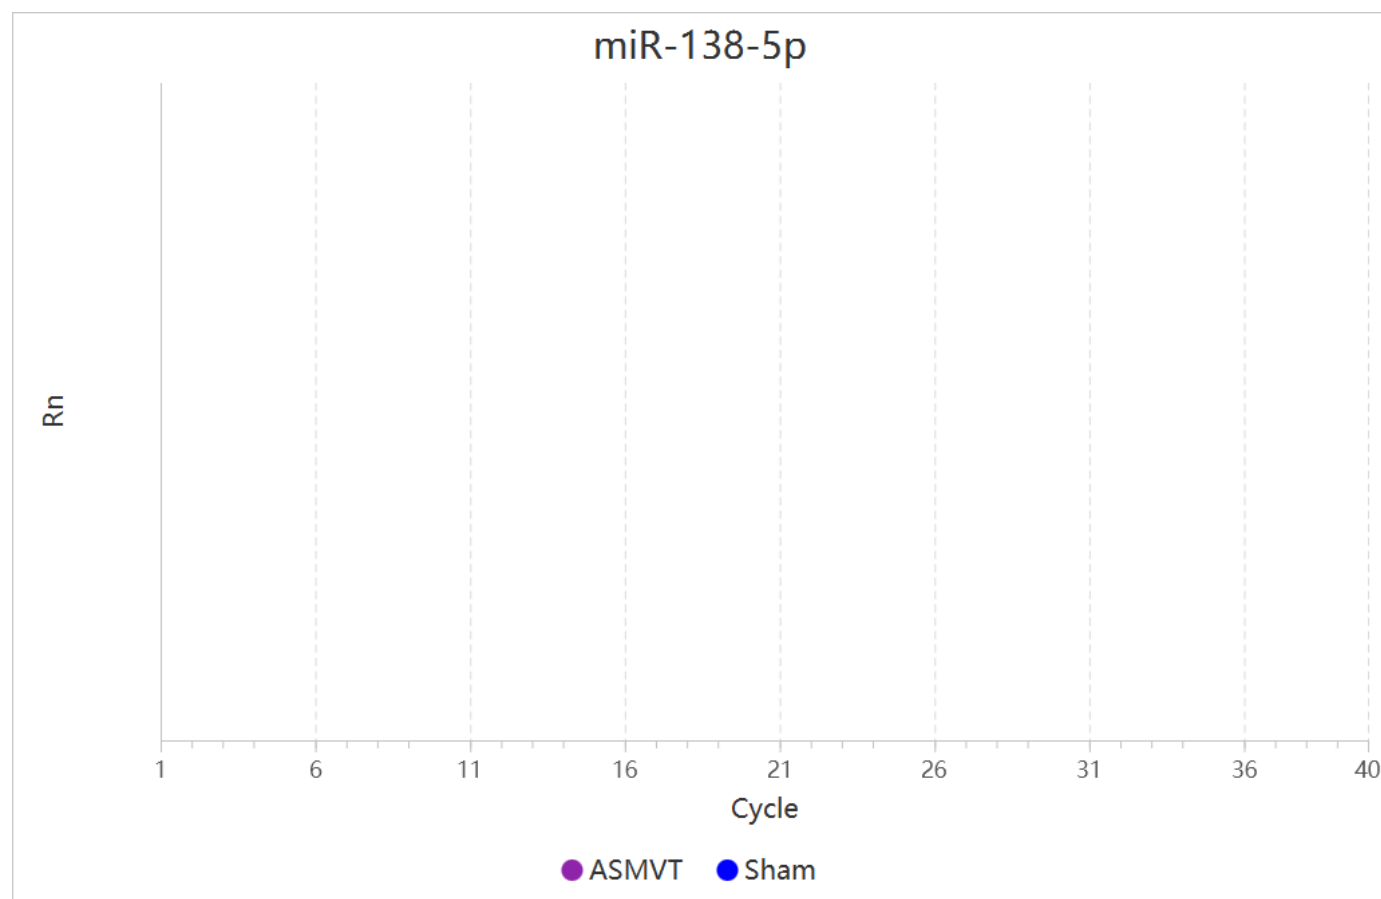



Melt Curve Plot

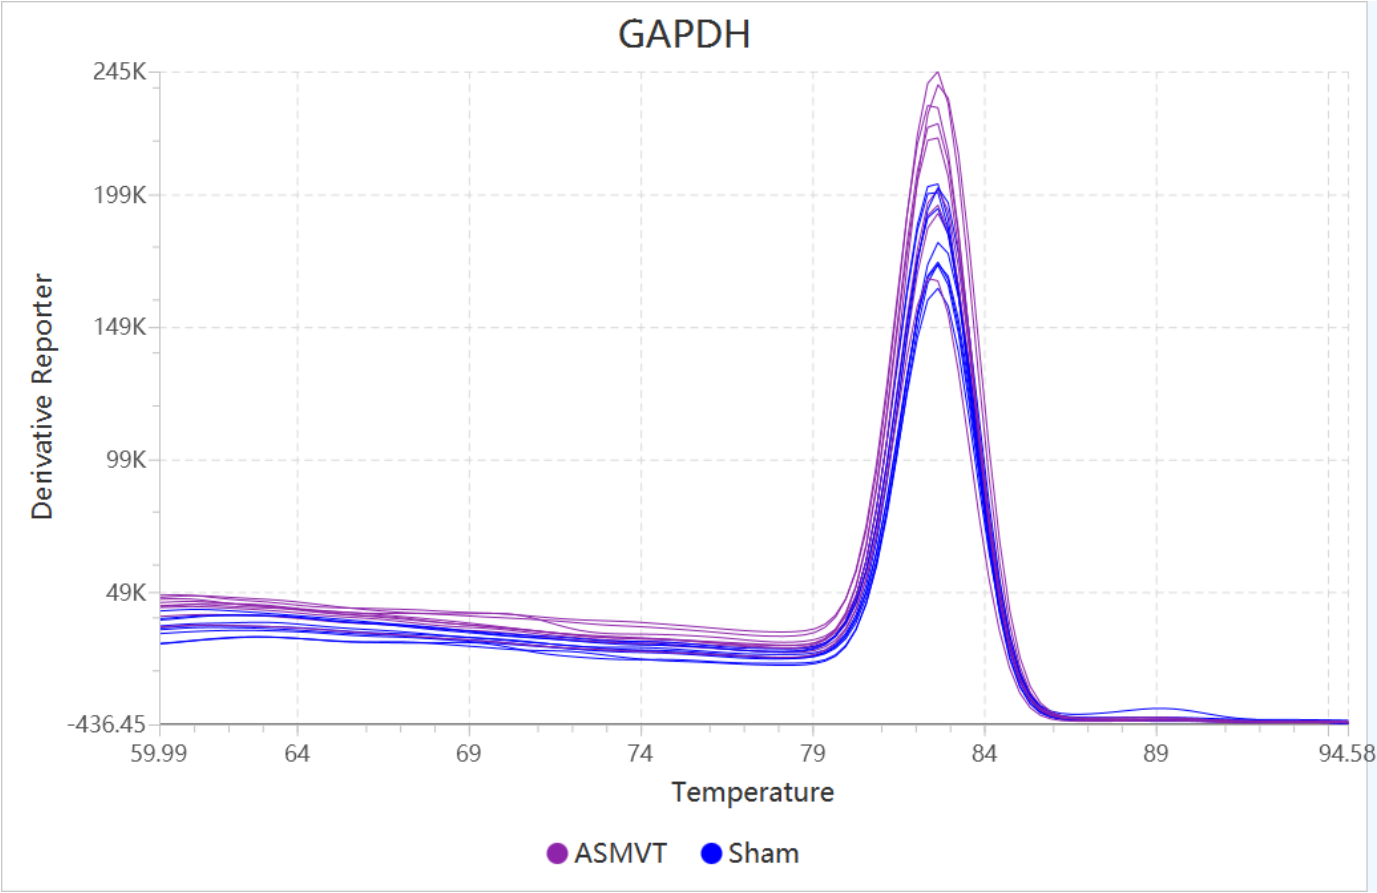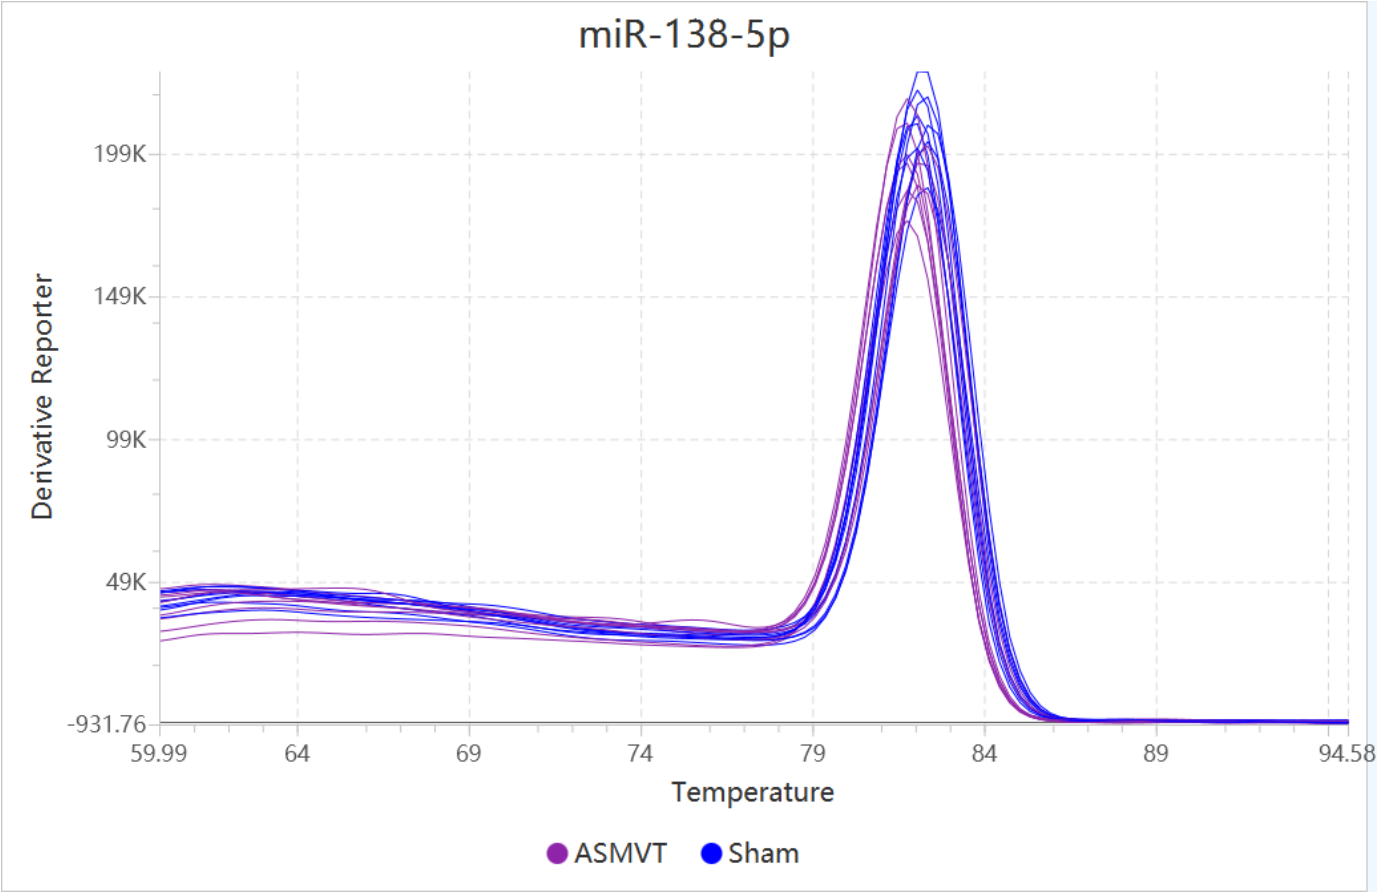

## Run Method

|                   |                      |
|-------------------|----------------------|
| Block Type        | 96-Well 0.2-mL Block |
| Sample Volume     | 20.0                 |
| Cover Temperature | 105.0                |
| Run mode          | FAST                 |

| Stage                 | Collection Flag | Ramp Rate  | Temperature | Hold Time | Starting Cycle | Auto Delta Temperature | Auto Delta Hold Time |
|-----------------------|-----------------|------------|-------------|-----------|----------------|------------------------|----------------------|
| Hold Stage            | false           | 2.74°C/sec | 95.0°C      | 20        | -              | -                      | -                    |
| PCR Stage (40 cycles) | false           | 2.74°C/sec | 95.0°C      | 1         | -              | -                      | -                    |
|                       | true            | 2.12°C/sec | 60.0°C      | 20        | -              | -                      | -                    |
| Melt Stage            | false           | 2.74°C/sec | 95.0°C      | 1         | -              | -                      | -                    |
|                       | false           | 2.12°C/sec | 60.0°C      | 20        | -              | -                      | -                    |
|                       | true            | 0.15°C/sec | 95.0°C      | 1         | -              | -                      | -                    |

## Primary Analysis Settings

### General

PCR Stage/Step Stage 2, Step 2  
Quantification Cycle Method Baseline Threshold

| Target  | Auto Threshold | Threshold | Auto Baseline | Baseline Start | Baseline End |
|---------|----------------|-----------|---------------|----------------|--------------|
| DEFAULT | Yes            | AUTO      | Yes           | AUTO           | AUTO         |

### Melt

Melt Stage/Step Stage 3, Step 3

| Target  | Multi Peak | Threshold Type | Peak Level (%) | Peak Height |
|---------|------------|----------------|----------------|-------------|
| DEFAULT | Yes        | Percentage     | 10             | -           |
| GAPDH   | Yes        | Percentage     | 10             | -           |

### QC Alerts

Curve Quality Alert Enabled No  
Results Quality Alert Enabled Yes

### Advanced

Set the Delta-Rn below which curves will be considered Non-Amplified No  
Primary Analysis Variant N/A

## Relative Quantification Settings

### General

|                            |                         |
|----------------------------|-------------------------|
| RQ Min/Max Calculations    | Confidence Level (95.0) |
| Max Allowed EqCq Mean      | 40                      |
| Include Adjusted EqCq Mean | No                      |
| Analysis Type              | Singleplex              |

### Endo Controls

|                    |                             |
|--------------------|-----------------------------|
| Normalization Type | Specific endogenous control |
|--------------------|-----------------------------|

| Target | Endogenous Control | Auto | Efficiency(%) |
|--------|--------------------|------|---------------|
| GAPDH  | Yes                | Yes  | AUTO          |

### References

|                  |      |
|------------------|------|
| Reference Sample | Sham |
|------------------|------|

## Relative Quantification Results (Sample)

| Sample | Target     | EqCq Mean | Adjusted EqCq Mean | $\Delta$ EqCq Mean | $\Delta$ EqCq SD | $\Delta$ EqCq SE | $\Delta\Delta$ EqCq | RQ    | RQ Min | RQ Max |
|--------|------------|-----------|--------------------|--------------------|------------------|------------------|---------------------|-------|--------|--------|
| Sham   | GAPDH      | 17.567    | 17.567             | -                  | -                | -                | -                   | -     | -      | -      |
| Sham   | miR-138-5p | 24.958    | 24.958             | 7.39               | 0.311            | 0.104            | -                   | 1     | 0.859  | 1.165  |
| ASMVT  | GAPDH      | 17.644    | 17.644             | -                  | -                | -                | -                   | -     | -      | -      |
| ASMVT  | miR-138-5p | 28.047    | 28.047             | 10.403             | 0.226            | 0.075            | 3.013               | 0.124 | 0.111  | 0.138  |

Relative Quantification Plot

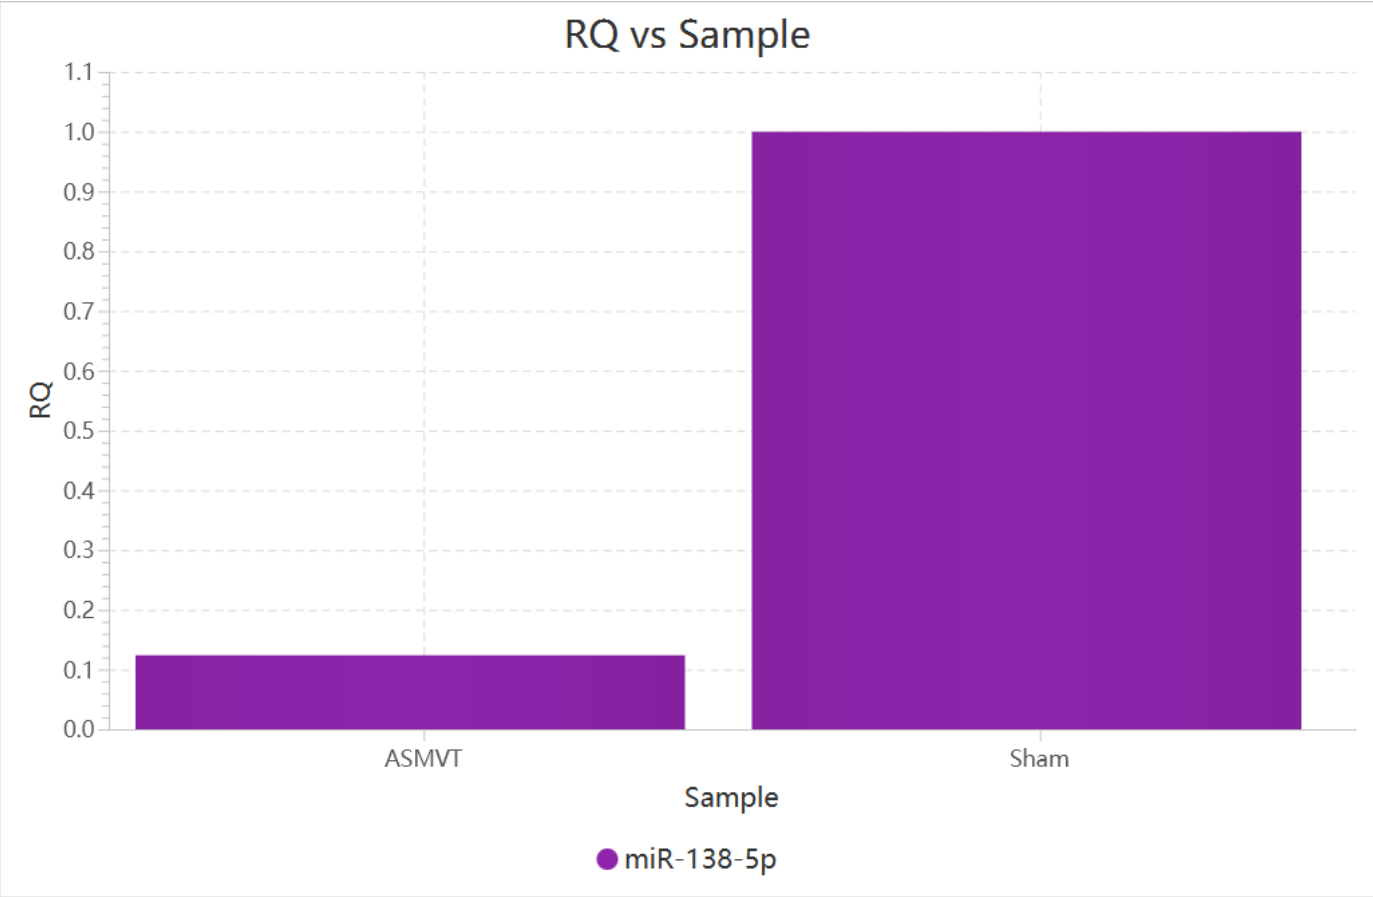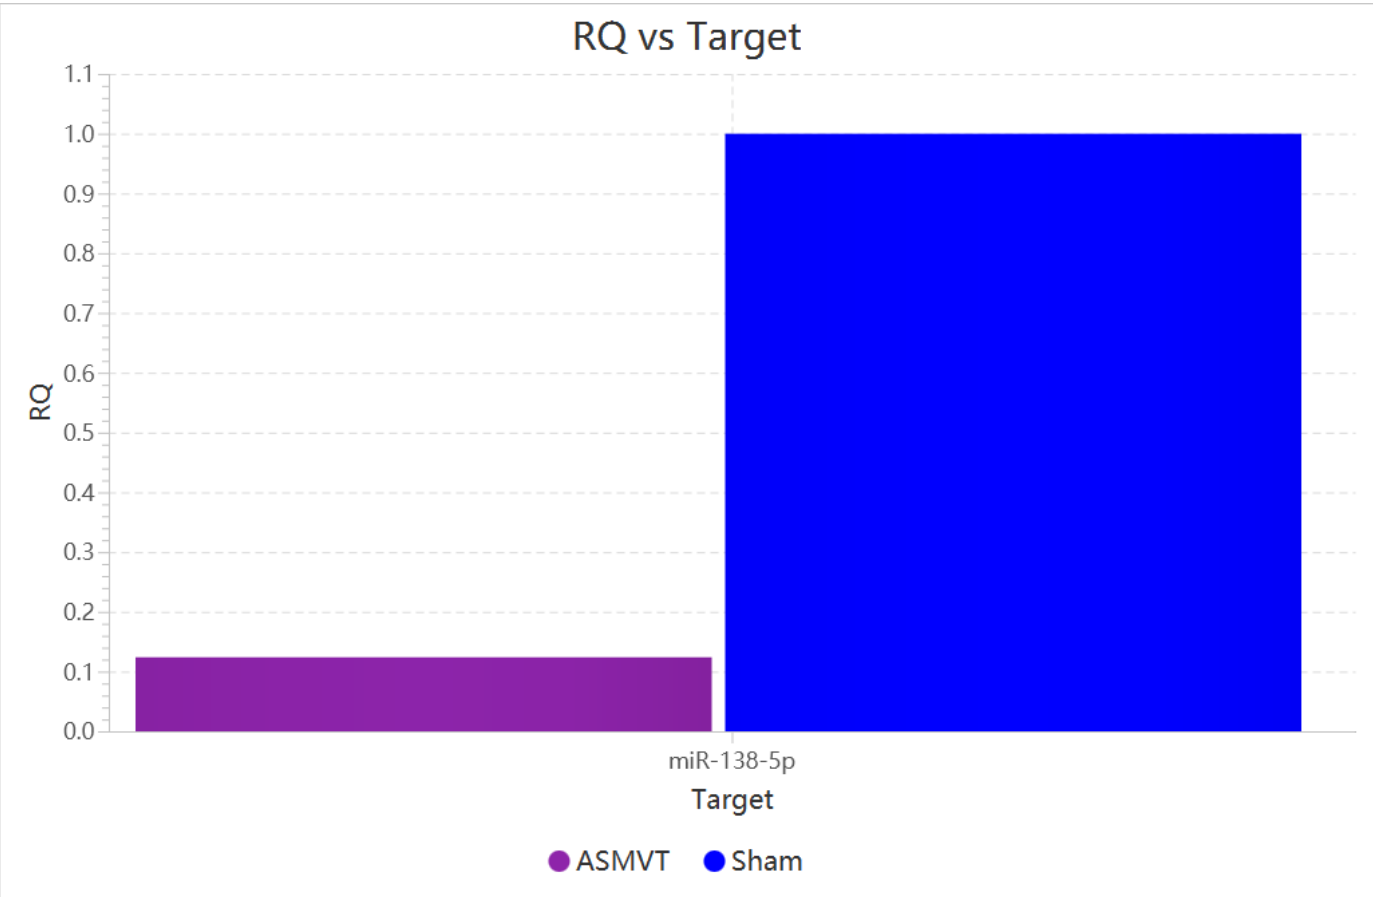

- End of Report -
