# Supplementary material for: miR-138-5p ameliorates intestinal barrier disruption caused by acute superior mesenteric vein thrombosis injury by inhibiting the NLRP3/HMGB1 axis
Source: PeerJ journal article supplement (doi:10.7717/peerj.16692), 2024-02-21
Supplement: DataFigure4A.zip [file DataFigure4A.zip]

## Sheet: Sheet1
		1	2	3	4	5	6	7	8	9	10	11	12
	A	0.072	0.041	0.019	0.028	0.054	0.095	0.083	0.068	0.058	0.012	0.057	0.056	450
	B	0.029	1.623	1.768	1.843	0.076	0.008	0.082	0.062	0.051	0.067	0.053	0.028	450
	C	0.017	1.154	1.267	1.321	0.039	0.044	0.034	0.058	0.079	0.059	0.035	0.093	450
	D	0.083	1.276	1.312	1.187	0.064	0.017	0.059	0.087	0.072	0.029	0.061	0.059	450
	E	0.075	1.345	1.462	1.511	0.028	0.033	0.054	0.038	0.095	0.084	0.058	0.072	450
	F	0.063	0.061	0.065	0.096	0.078	0.047	0.011	0.091	0.054	0.061	0.064	0.053	450
	G	0.089	0.067	0.076	0.075	0.081	0.048	0.069	0.077	0.046	0.044	0.028	0.098	450
	H	0.021	0.064	0.057	0.065	0.019	0.084	0.079	0.029	0.046	0.045	0.031	0.053	450
		1.623	1.768	1.843	1.74467
		1.154	1.267	1.321
		1.276	1.312	1.187
		1.345	1.462	1.511
	NC	93.0264	101.337	105.636
	miR-138 inh	66.1444	72.6213	75.7165
	miR-138 inh+si-NC	73.1372	75.2006	68.0359
	miR-138 inh+si-NLRP3	77.0921	83.7982	86.6068
