# Supplementary material for: miR-138-5p ameliorates intestinal barrier disruption caused by acute superior mesenteric vein thrombosis injury by inhibiting the NLRP3/HMGB1 axis
Source: PeerJ journal article supplement (doi:10.7717/peerj.16692), 2024-02-21
Supplement: DataFigure6A.zip [file DataFigure6A.zip]

# Plate Results Report

A22-4\_Copy.eds

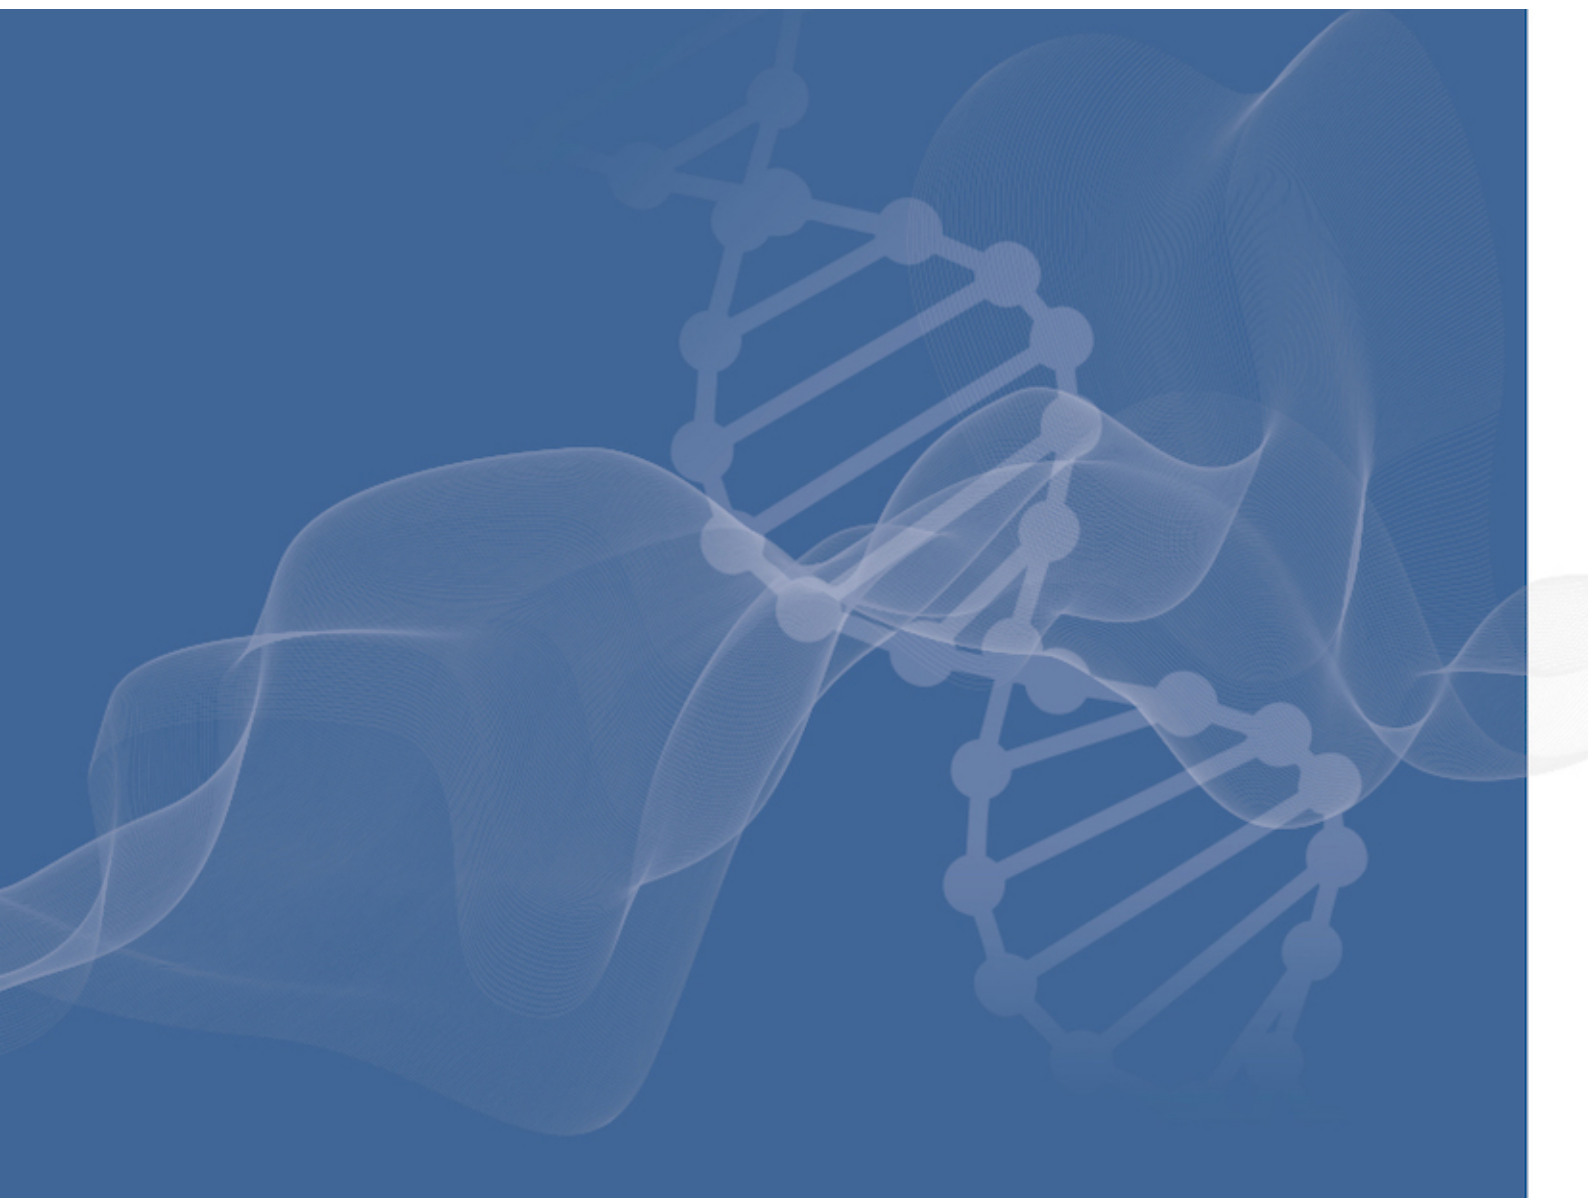

## Summary

| Property                    | Details                                                 |
|-----------------------------|---------------------------------------------------------|
| Bar Code                    | -                                                       |
| File Name                   | A22-4_Copy.eds                                          |
| Run Start Date/Time         | Dec 1, 2021 9:11:47 AM                                  |
| Run End Date/Time           | Dec 1, 2021 10:11:34 AM                                 |
| Run Duration                | 59 minutes, and 47 seconds                              |
| Operator                    | DEFAULT                                                 |
| Instrument Name             | SVT004                                                  |
| Instrument Type             | QuantStudio™ 3 System                                   |
| Instrument Serial Number    | SVT004                                                  |
| Block Type                  | 96-Well 0.2-mL                                          |
| Block Serial Number         | 41145627                                                |
| Heated Cover Serial Number  | N/A                                                     |
| PCR Stage/Step Number       | Stage 2, Step 2                                         |
| Melt Stage Number           | Stage 3                                                 |
| Quantification Cycle Method | Baseline Threshold                                      |
| Comment                     | -                                                       |
| Software Name and Version   | Design & Analysis Software v2.6.0                       |
| Plugin Name and Version     | Primary Analysis v1.7.0, Relative Quantification v1.5.0 |
| Analysis Date/Time          | Jul 19, 2023 9:19:14 AM                                 |

## Well Table

| Well | Sample            | Target     | Task    | Cq     | Cq Confidence | Amp Score | Amp Status | Cq Threshold | Baseline Start/End | Melt Temp |
|------|-------------------|------------|---------|--------|---------------|-----------|------------|--------------|--------------------|-----------|
| C7   | ASMVT             | GAPDH      | Unknown | 17.735 | 0.986         | 1.838     | AMP        | 2.123        | 3-10               | 82.653    |
| C8   | ASMVT             | GAPDH      | Unknown | 18.043 | 0.963         | 1.839     | AMP        | 2.123        | 3-12               | 82.504    |
| C9   | ASMVT             | GAPDH      | Unknown | 17.485 | 0.986         | 1.835     | AMP        | 2.123        | 3-10               | 82.653    |
| C10  | ASMVT             | miR-138-5p | Unknown | 27.369 | 0.991         | 1.859     | AMP        | 1.96         | 3-18               | 82.355    |
| C11  | ASMVT             | miR-138-5p | Unknown | 27.355 | 0.987         | 1.85      | AMP        | 1.96         | 3-17               | 82.058    |
| C12  | ASMVT             | miR-138-5p | Unknown | 27.29  | 0.99          | 1.85      | AMP        | 1.96         | 3-17               | 82.207    |
| D7   | ASMVT             | GAPDH      | Unknown | 18.031 | 0.983         | 1.849     | AMP        | 2.123        | 3-10               | 82.504    |
| D8   | ASMVT             | GAPDH      | Unknown | 17.526 | 0.989         | 1.844     | AMP        | 2.123        | 3-10               | 82.653    |
| D9   | ASMVT             | GAPDH      | Unknown | 17.8   | 0.968         | 1.839     | AMP        | 2.123        | 3-9                | 82.504    |
| D10  | ASMVT             | miR-138-5p | Unknown | 27.215 | 0.988         | 1.865     | AMP        | 1.96         | 3-18               | 82.355    |
| D11  | ASMVT             | miR-138-5p | Unknown | 27.315 | 0.987         | 1.848     | AMP        | 1.96         | 3-19               | 82.058    |
| D12  | ASMVT             | miR-138-5p | Unknown | 27.607 | 0.939         | 1.848     | AMP        | 1.96         | 3-20               | 81.909    |
| E7   | ASMVT             | GAPDH      | Unknown | 18.191 | 0.985         | 1.845     | AMP        | 2.123        | 3-10               | 82.504    |
| E8   | ASMVT             | GAPDH      | Unknown | 17.824 | 0.991         | 1.838     | AMP        | 2.123        | 3-10               | 82.653    |
| E9   | ASMVT             | GAPDH      | Unknown | 18.136 | 0.987         | 1.835     | AMP        | 2.123        | 3-10               | 82.504    |
| E10  | ASMVT             | miR-138-5p | Unknown | 27.553 | 0.988         | 1.851     | AMP        | 1.96         | 3-19               | 82.206    |
| E11  | ASMVT             | miR-138-5p | Unknown | 27.507 | 0.98          | 1.834     | AMP        | 1.96         | 3-17               | 81.759    |
| E12  | ASMVT             | miR-138-5p | Unknown | 27.361 | 0.988         | 1.855     | AMP        | 1.96         | 3-19               | 81.909    |
| F7   | ASMVT+miR-138 mim | GAPDH      | Unknown | 18.247 | 0.987         | 1.852     | AMP        | 2.123        | 3-9                | 82.355    |
| F8   | ASMVT+miR-138 mim | GAPDH      | Unknown | 18.413 | 0.99          | 1.841     | AMP        | 2.123        | 3-12               | 82.504    |
| F9   | ASMVT+miR-138 mim | GAPDH      | Unknown | 18.156 | 0.988         | 1.837     | AMP        | 2.123        | 3-9                | 82.504    |
| F10  | ASMVT+miR-138 mim | miR-138-5p | Unknown | 24.494 | 0.99          | 1.852     | AMP        | 1.96         | 3-17               | 82.355    |
| F11  | ASMVT+miR-138 mim | miR-138-5p | Unknown | 24.427 | 0.989         | 1.858     | AMP        | 1.96         | 3-15               | 81.909    |
| F12  | ASMVT+miR-138 mim | miR-138-5p | Unknown | 24.499 | 0.99          | 1.849     | AMP        | 1.96         | 3-17               | 82.058    |
| G7   | ASMVT+miR-138 mim | GAPDH      | Unknown | 18.167 | 0.985         | 1.837     | AMP        | 2.123        | 3-9                | 82.504    |
| G8   | ASMVT+miR-138 mim | GAPDH      | Unknown | 18.091 | 0.986         | 1.846     | AMP        | 2.123        | 3-11               | 82.504    |
| G9   | ASMVT+miR-138 mim | GAPDH      | Unknown | 17.811 | 0.992         | 1.848     | AMP        | 2.123        | 3-10               | 82.504    |
| G10  | ASMVT+miR-138 mim | miR-138-5p | Unknown | 24.615 | 0.992         | 1.861     | AMP        | 1.96         | 3-17               | 82.355    |
| G11  | ASMVT+miR-138 mim | miR-138-5p | Unknown | 24.767 | 0.98          | 1.835     | AMP        | 1.96         | 3-17               | 81.759    |

| Well | Sample            | Target     | Task    | Cq     | Cq Confidence | Amp Score | Amp Status | Cq Threshold | Baseline Start/End | Melt Temp |
|------|-------------------|------------|---------|--------|---------------|-----------|------------|--------------|--------------------|-----------|
| G12  | ASMVT+miR-138 mim | miR-138-5p | Unknown | 24.611 | 0.988         | 1.854     | AMP        | 1.96         | 3-17               | 81.909    |
| H7   | ASMVT+miR-138 mim | GAPDH      | Unknown | 18.221 | 0.985         | 1.849     | AMP        | 2.123        | 3-10               | 82.504    |
| H8   | ASMVT+miR-138 mim | GAPDH      | Unknown | 18.019 | 0.985         | 1.848     | AMP        | 2.123        | 3-10               | 82.504    |
| H9   | ASMVT+miR-138 mim | GAPDH      | Unknown | 18.112 | 0.98          | 1.836     | AMP        | 2.123        | 3-11               | 82.504    |
| H10  | ASMVT+miR-138 mim | miR-138-5p | Unknown | 24.845 | 0.992         | 1.843     | AMP        | 1.96         | 3-17               | 82.355    |
| H11  | ASMVT+miR-138 mim | miR-138-5p | Unknown | 24.678 | 0.988         | 1.852     | AMP        | 1.96         | 3-17               | 81.909    |
| H12  | ASMVT+miR-138 mim | miR-138-5p | Unknown | 24.858 | 0.992         | 1.832     | AMP        | 1.96         | 3-16               | 81.909    |

## Replicate Group Table

| Sample            | Target     | No. of Replicates | Cq Mean | Cq SD |
|-------------------|------------|-------------------|---------|-------|
| ASMVT             | GAPDH      | 9                 | 17.864  | 0.255 |
| ASMVT             | miR-138-5p | 9                 | 27.397  | 0.13  |
| ASMVT+miR-138 mim | GAPDH      | 9                 | 18.137  | 0.166 |
| ASMVT+miR-138 mim | miR-138-5p | 9                 | 24.644  | 0.156 |

## Plate Layout

|   | 1 | 2 | 3 | 4 | 5 | 6 | 7                                  | 8                                  | 9                                  | 10                                      | 11                                      | 12                                      |
|---|---|---|---|---|---|---|------------------------------------|------------------------------------|------------------------------------|-----------------------------------------|-----------------------------------------|-----------------------------------------|
| A |   |   |   |   |   |   |                                    |                                    |                                    |                                         |                                         |                                         |
| B |   |   |   |   |   |   |                                    |                                    |                                    |                                         |                                         |                                         |
| C |   |   |   |   |   |   | ● ASMT<br>GAPDH (17.735)           | ● ASMT<br>GAPDH (18.043)           | ● ASMT<br>GAPDH (17.485)           | ● ASMT<br>miR-138-5p (27.369)           | ● ASMT<br>miR-138-5p (27.355)           | ● ASMT<br>miR-138-5p (27.29)            |
| D |   |   |   |   |   |   | ● ASMT<br>GAPDH (18.031)           | ● ASMT<br>GAPDH (17.526)           | ● ASMT<br>GAPDH (17.8)             | ● ASMT<br>miR-138-5p (27.215)           | ● ASMT<br>miR-138-5p (27.315)           | ● ASMT<br>miR-138-5p (27.607)           |
| E |   |   |   |   |   |   | ● ASMT<br>GAPDH (18.191)           | ● ASMT<br>GAPDH (17.824)           | ● ASMT<br>GAPDH (18.136)           | ● ASMT<br>miR-138-5p (27.553)           | ● ASMT<br>miR-138-5p (27.507)           | ● ASMT<br>miR-138-5p (27.361)           |
| F |   |   |   |   |   |   | ● ASMT+miR-13...<br>GAPDH (18.247) | ● ASMT+miR-13...<br>GAPDH (18.413) | ● ASMT+miR-13...<br>GAPDH (18.156) | ● ASMT+miR-13...<br>miR-138-5p (24.494) | ● ASMT+miR-13...<br>miR-138-5p (24.427) | ● ASMT+miR-13...<br>miR-138-5p (24.499) |
| G |   |   |   |   |   |   | ● ASMT+miR-13...<br>GAPDH (18.167) | ● ASMT+miR-13...<br>GAPDH (18.091) | ● ASMT+miR-13...<br>GAPDH (17.811) | ● ASMT+miR-13...<br>miR-138-5p (24.615) | ● ASMT+miR-13...<br>miR-138-5p (24.767) | ● ASMT+miR-13...<br>miR-138-5p (24.611) |
| H |   |   |   |   |   |   | ● ASMT+miR-13...<br>GAPDH (18.221) | ● ASMT+miR-13...<br>GAPDH (18.019) | ● ASMT+miR-13...<br>GAPDH (18.112) | ● ASMT+miR-13...<br>miR-138-5p (24.845) | ● ASMT+miR-13...<br>miR-138-5p (24.678) | ● ASMT+miR-13...<br>miR-138-5p (24.858) |

## Amplification Plot (dRn)

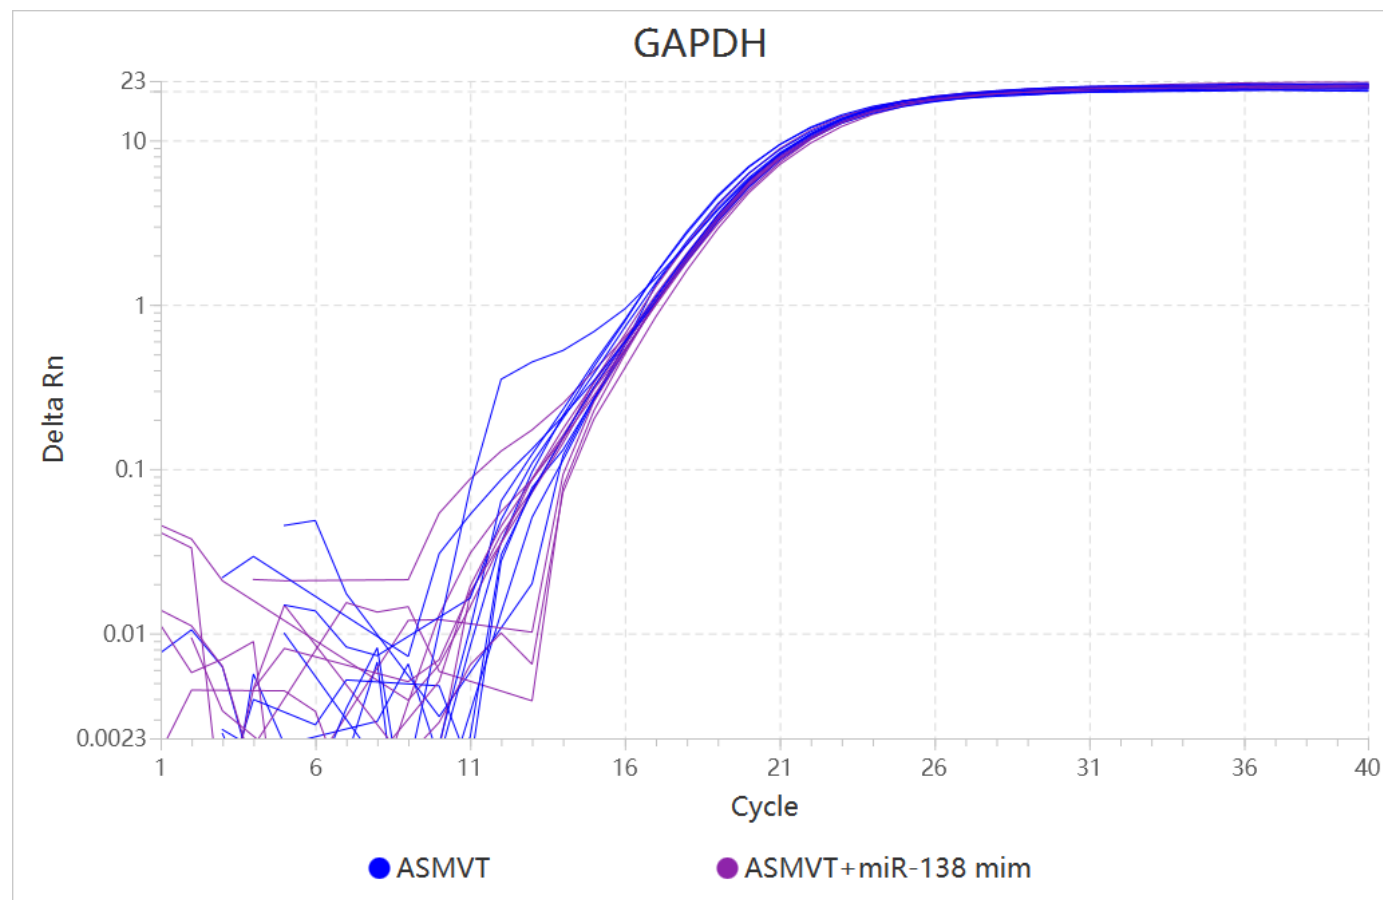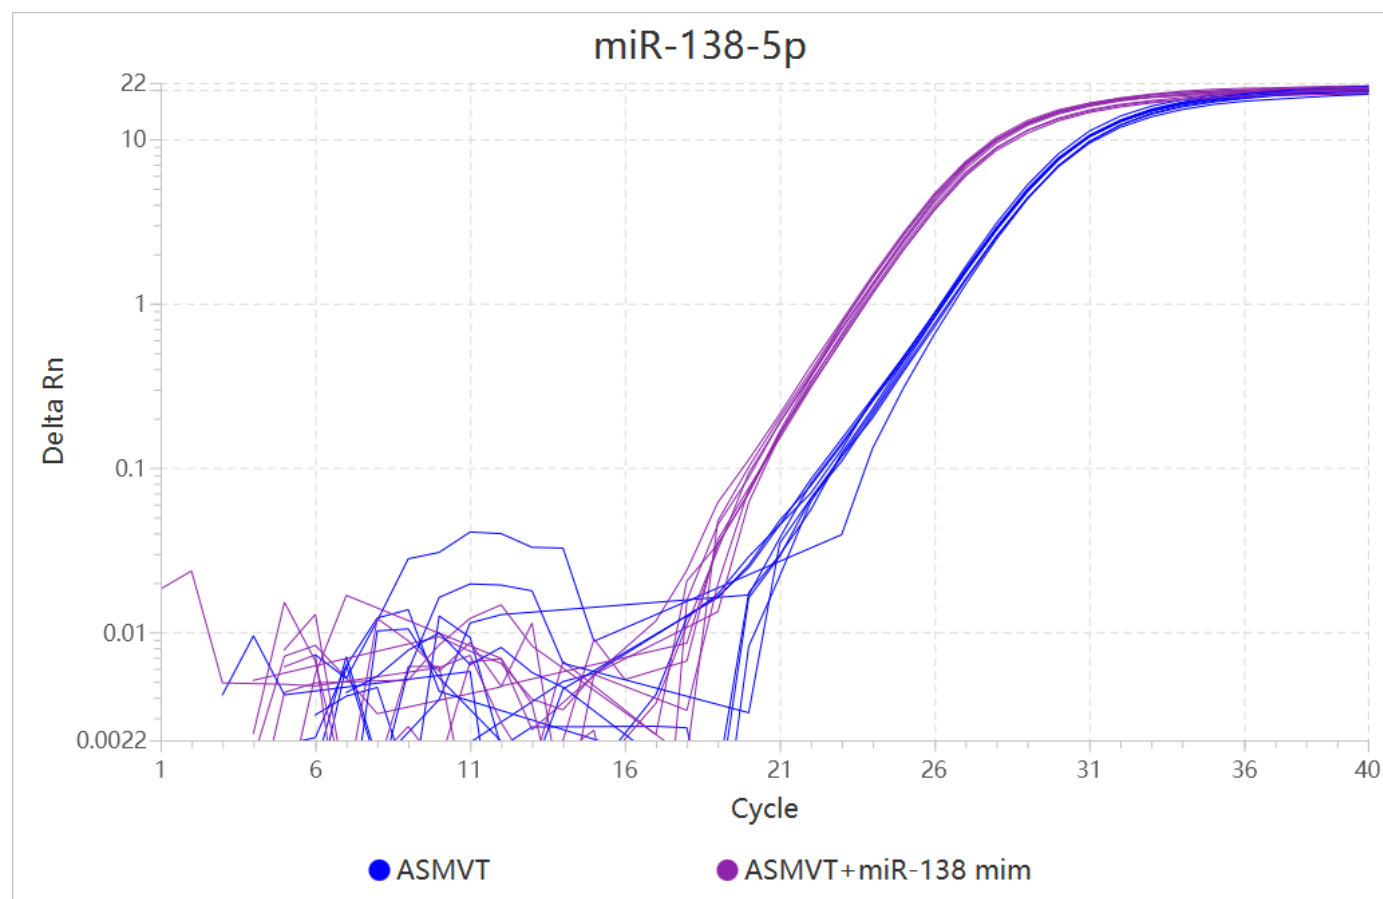

Amplification Plot (Rn)

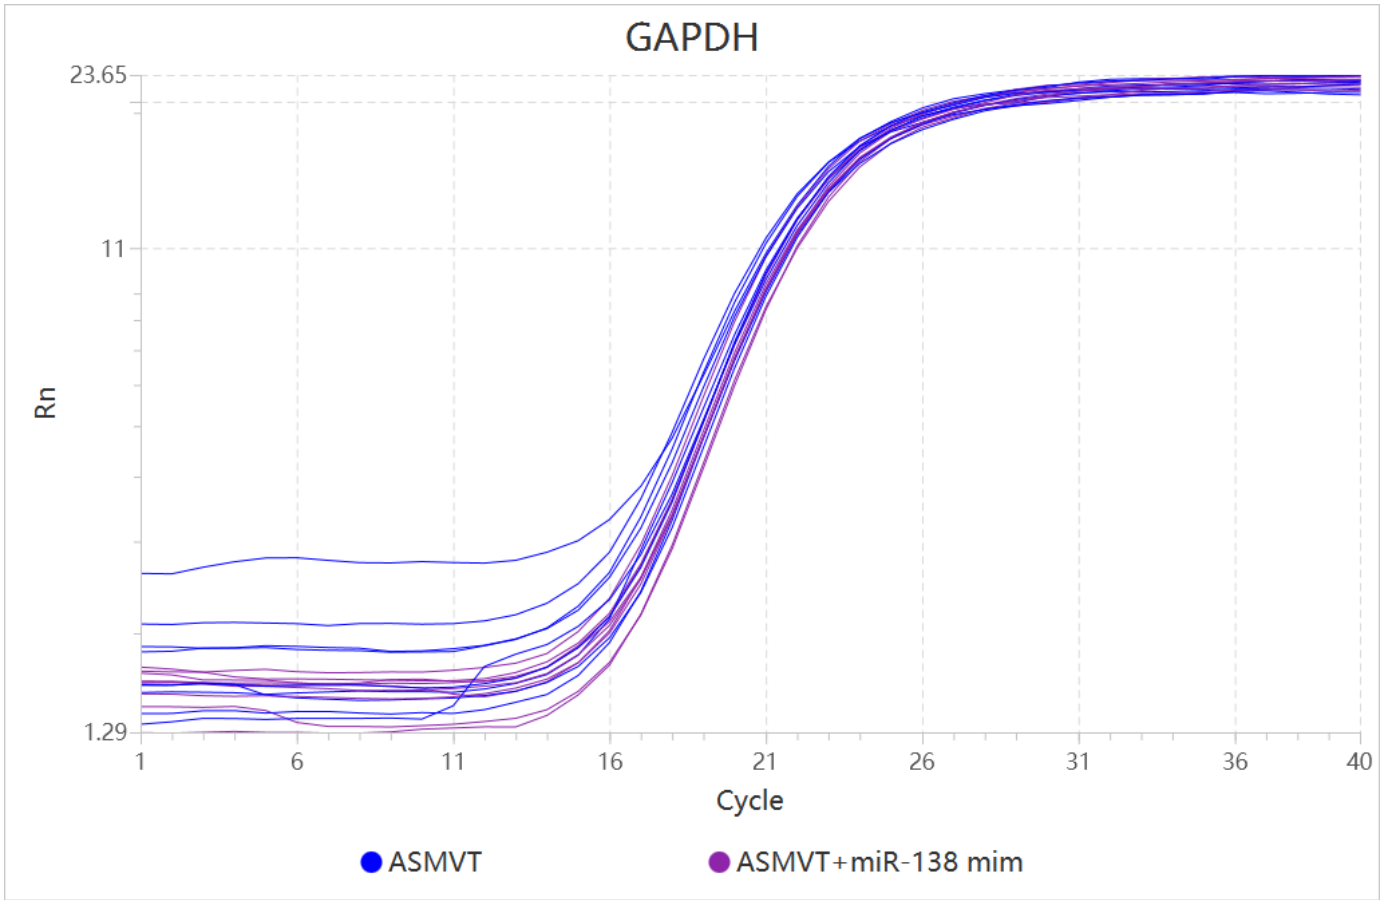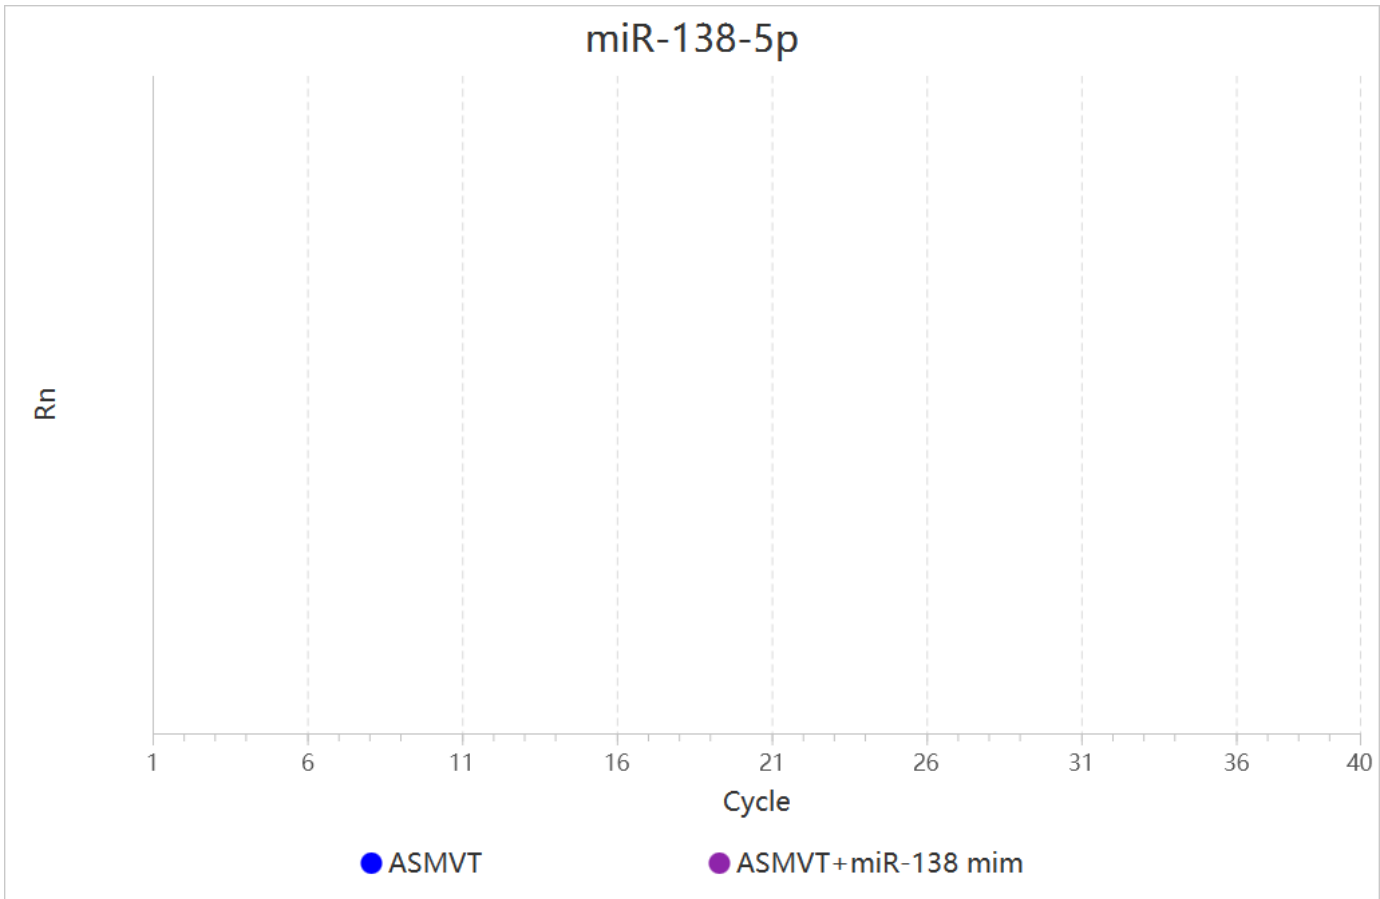

Melt Curve Plot

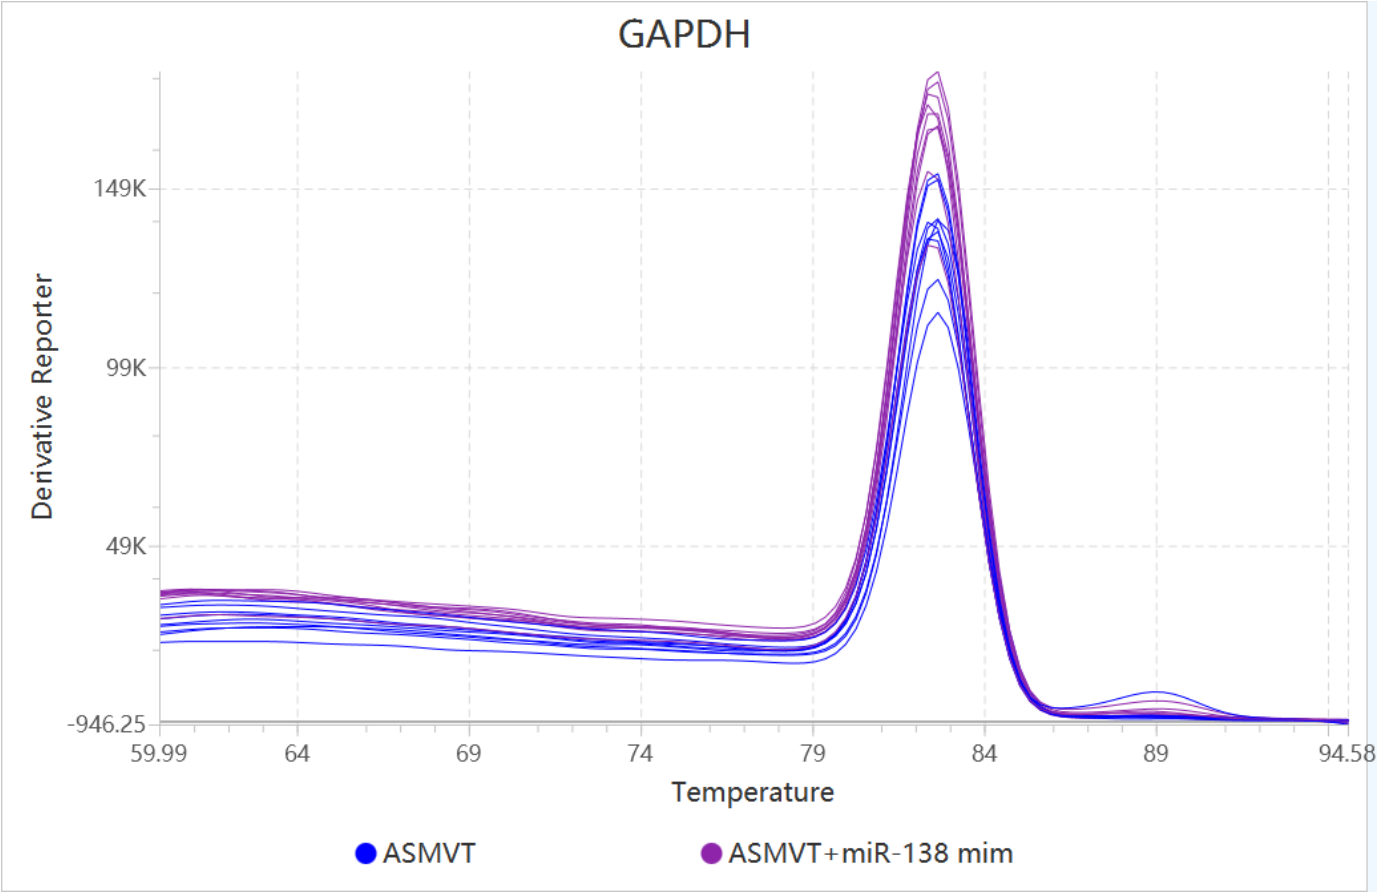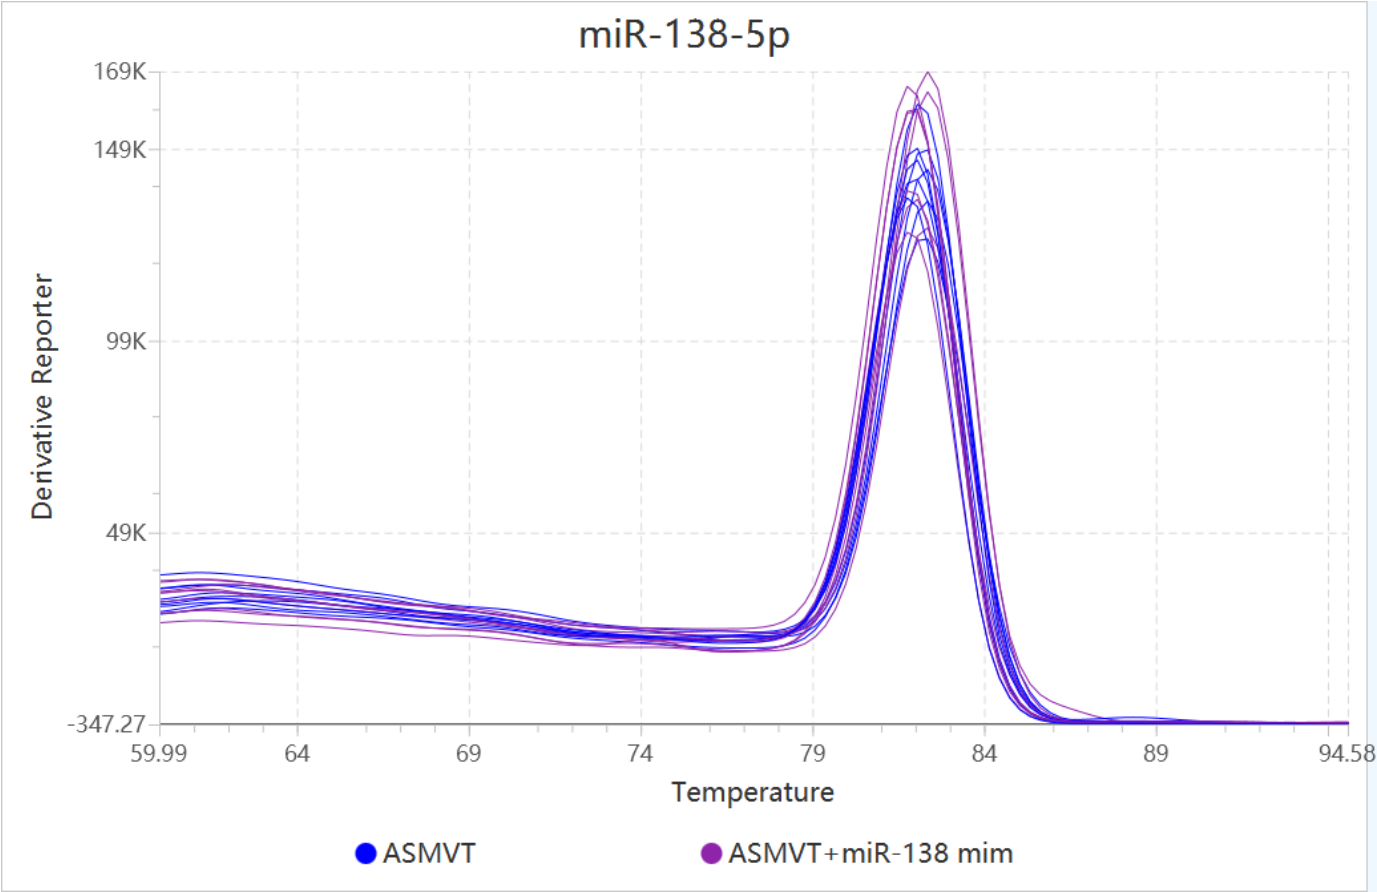

## Run Method

|                   |                      |
|-------------------|----------------------|
| Block Type        | 96-Well 0.2-mL Block |
| Sample Volume     | 20.0                 |
| Cover Temperature | 105.0                |
| Run mode          | FAST                 |

| Stage                 | Collection Flag | Ramp Rate  | Temperature | Hold Time | Starting Cycle | Auto Delta Temperature | Auto Delta Hold Time |
|-----------------------|-----------------|------------|-------------|-----------|----------------|------------------------|----------------------|
| Hold Stage            | false           | 2.74°C/sec | 95.0°C      | 20        | -              | -                      | -                    |
| PCR Stage (40 cycles) | false           | 2.74°C/sec | 95.0°C      | 1         | -              | -                      | -                    |
|                       | true            | 2.12°C/sec | 60.0°C      | 20        | -              | -                      | -                    |
| Melt Stage            | false           | 2.74°C/sec | 95.0°C      | 1         | -              | -                      | -                    |
|                       | false           | 2.12°C/sec | 60.0°C      | 20        | -              | -                      | -                    |
|                       | true            | 0.15°C/sec | 95.0°C      | 1         | -              | -                      | -                    |

## Primary Analysis Settings

### General

PCR Stage/Step Stage 2, Step 2  
Quantification Cycle Method Baseline Threshold

| Target  | Auto Threshold | Threshold | Auto Baseline | Baseline Start | Baseline End |
|---------|----------------|-----------|---------------|----------------|--------------|
| DEFAULT | Yes            | AUTO      | Yes           | AUTO           | AUTO         |

### Melt

Melt Stage/Step Stage 3, Step 3

| Target  | Multi Peak | Threshold Type | Peak Level (%) | Peak Height |
|---------|------------|----------------|----------------|-------------|
| DEFAULT | Yes        | Percentage     | 10             | -           |
| GAPDH   | Yes        | Percentage     | 10             | -           |

### QC Alerts

Curve Quality Alert Enabled No  
Results Quality Alert Enabled Yes

### Advanced

Set the Delta-Rn below which curves will be considered Non-Amplified No  
Primary Analysis Variant N/A

## Relative Quantification Settings

### General

|                            |                         |
|----------------------------|-------------------------|
| RQ Min/Max Calculations    | Confidence Level (95.0) |
| Max Allowed EqCq Mean      | 40                      |
| Include Adjusted EqCq Mean | No                      |
| Analysis Type              | Singleplex              |

### Endo Controls

|                    |                             |
|--------------------|-----------------------------|
| Normalization Type | Specific endogenous control |
|--------------------|-----------------------------|

| Target | Endogenous Control | Auto | Efficiency(%) |
|--------|--------------------|------|---------------|
| GAPDH  | Yes                | Yes  | AUTO          |

### References

|                  |       |
|------------------|-------|
| Reference Sample | ASMVT |
|------------------|-------|

## Relative Quantification Results (Sample)

| Sample            | Target     | EqCq Mean | Adjusted EqCq Mean | $\Delta$ EqCq Mean | $\Delta$ EqCq SD | $\Delta$ EqCq SE | $\Delta\Delta$ EqCq | RQ   | RQ Min | RQ Max |
|-------------------|------------|-----------|--------------------|--------------------|------------------|------------------|---------------------|------|--------|--------|
| ASMVT             | GAPDH      | 17.864    | 17.864             | -                  | -                | -                | -                   | -    | -      | -      |
| ASMVT             | miR-138-5p | 27.397    | 27.397             | 9.533              | 0.287            | 0.096            | -                   | 1    | 0.869  | 1.151  |
| ASMVT+miR-138 mim | GAPDH      | 18.137    | 18.137             | -                  | -                | -                | -                   | -    | -      | -      |
| ASMVT+miR-138 mim | miR-138-5p | 24.644    | 24.644             | 6.506              | 0.228            | 0.076            | -3.027              | 8.15 | 7.29   | 9.112  |

## Relative Quantification Plot

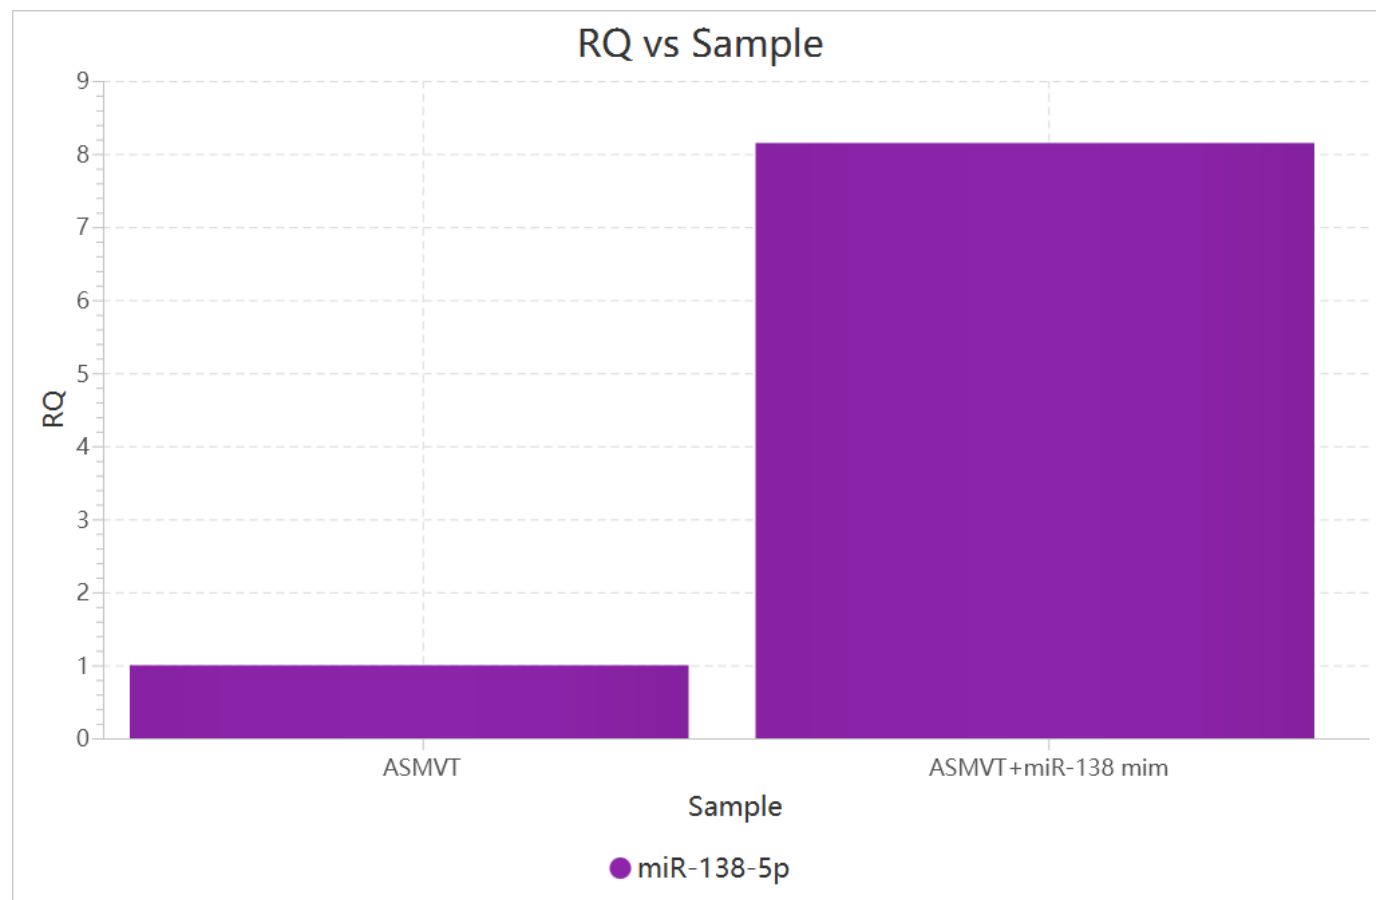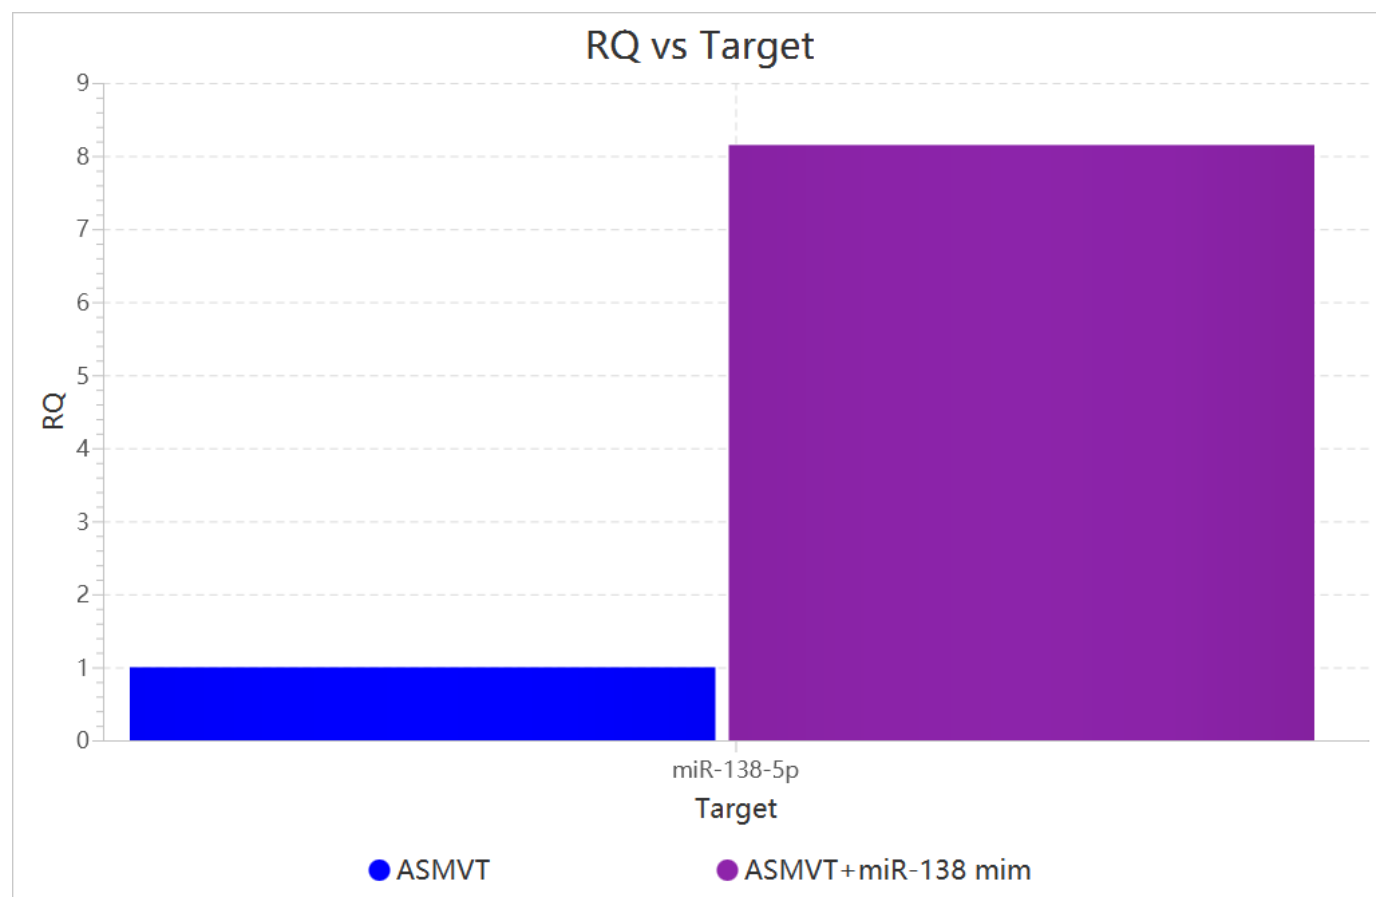

- End of Report -
